1

2 Spatial and temporal control of norovirus protease activity is determined by  
3 polyprotein processing and intermolecular interactions within the viral  
4 replication complex.

5

6

7 Edward Emmott<sup>1\*¶</sup>, Alexis de Rougemont<sup>2,3¶</sup>, Jürgen Haas<sup>4</sup> & Ian Goodfellow<sup>1\*</sup>

8

9

10 Running Title: Regulation of norovirus protease activity during infection

11

12

13 1. Division of Virology, Department of Pathology, University of Cambridge,

14 Addenbrookes Hospital, Hills Road, Cambridge, UK

15 2. National Reference Centre for Gastroenteritis Viruses, Labology of Biology

16 and Pathology, University Hospital Dijon Bourgogne, Dijon, France

17 3. AgroSup Dijon, PAM UMR A 02.102 Bourgogne Franche-Comte University,

18 Dijon, France.

19 4. Division of Infection and Pathway Medicine, University of Edinburgh

20 Medical School, Edinburgh, UK

21

22 **\*Corresponding author**

23 \*Dr. Edward Emmott, [ee273@cam.ac.uk](mailto:ee273@cam.ac.uk)

24 \*Prof. Ian Goodfellow, [ig299@cam.ac.uk](mailto:ig299@cam.ac.uk)

25 ¶ These authors contributed equally.

## 26 **Abstract**

27 Norovirus infections are a major cause of acute viral gastroenteritis and a  
28 significant burden to human health globally. A vital process for norovirus  
29 replication is the processing of the nonstructural polyprotein, by an internal  
30 protease, into the necessary viral components required to form the viral  
31 replication complex. This cleavage occurs at different rates resulting in the  
32 accumulation of stable precursor forms. In this report, we characterized how  
33 precursor forms of the norovirus protease accumulate during infection. Using  
34 stable forms of the protease precursors we demonstrated that these are all  
35 proteolytically active *in vitro*, but that when expressed in cells, activity is  
36 determined by both substrate and protease localization. Whilst all precursors  
37 could cleave a replication complex-associated substrate, only a subset of  
38 precursors lacking NS4 were capable of efficiently cleaving a cytoplasmic  
39 substrate. For the first time, the full range of protein-protein interactions  
40 between murine and human norovirus proteins were mapped by LUMIER assay,  
41 with conserved interactions between replication complex members, modifying  
42 the localization of a subset of precursors. Finally, we demonstrate that re-  
43 targeting of a poorly cleaved artificial cytoplasmic substrate to the replication  
44 complex is sufficient to permit efficient cleavage in the context of norovirus  
45 infection. This offers a model for how norovirus can regulate the timing of  
46 substrate cleavage throughout the replication cycle. The norovirus protease  
47 represents a key target in the search for effective antiviral treatments for  
48 norovirus infection. An improved understanding of protease function and  
49 regulation, as well as identification of interactions between the other non-  
50 structural proteins, offers new avenues for antiviral drug design.

51

## 52 **Introduction**

53 Noroviruses are the causative agent of winter vomiting disease, and following  
54 the introduction of the rotavirus vaccine, a leading cause of viral gastroenteritis  
55 worldwide. Whilst models for human norovirus infection have recently been  
56 developed (1, 2), due to the availability of efficient cell culture and robust  
57 reverse genetics systems, murine norovirus (MNV) has been widely used to  
58 dissect the molecular details of viral translation and replication (3–5).

59

60 Noroviruses are small, non-enveloped positive sense RNA viruses (+ssRNA)  
61 forming a genus within the *Caliciviridae* family. As observed with many other  
62 +ssRNA viruses, noroviruses generate the majority of the viral replicase  
63 components by cleavage of a long polyprotein by the viral protease NS6 (Figure  
64 1A) (6). A key benefit of this strategy is that due to differing rates of cleavage,  
65 polyprotein processing generates both the fully processed products and a range  
66 of stable precursor intermediates (6, 7). The role of polyprotein precursors in  
67 viral replication have been studied extensively for the *Picornaviridae* which  
68 share similarities in their polyprotein organisation (8). For noroviruses however,  
69 the sole precursor to be examined to date in any detail is the NS6-NS7 precursor  
70 (also known as Pro-Pol, or 3CD) (9, 10). Cleavage of the NS6-7 junction is known  
71 to be essential for norovirus viability and the NS6-NS7 precursor retains both  
72 protease and polymerase activities (9, 10). In contrast, for some members of the  
73 *Caliciviridae*, whilst a cleavage site between NS6 and NS7 is present, this  
74 precursor remains uncleaved (11).

75

76 Precursor protein functions are often distinct from those of the fully cleaved  
77 mature products (12). The rate of precursor cleavage and accumulation can also  
78 regulate key stages of the viral replication cycle; for example the cleavage of  
79 alphavirus non-structural proteins from the P123 and P1234 polyproteins  
80 provides temporal regulation of sense and anti-sense RNA transcript synthesis  
81 (13). In addition to cleaving viral substrates, viral proteases also target cellular  
82 proteins. We recently identified the host protein poly(A) binding protein (PABP)  
83 as a target of the norovirus protease, particularly at late stages in the viral life  
84 cycle. The cleavage of PABP forms part of a viral strategy to inhibit host  
85 translation, and therefore the production of interferon-stimulated genes (14).  
86 However the means by which PABP cleavage was restricted to late times post-  
87 infection was unclear.

88

89 Processing of the norovirus polyprotein by NS6 results in the production of six  
90 proteins; NS1/2, NS3, NS4, NS5, NS6 and NS7 (15) (Figure 1). NS5 functions as  
91 both a protein primer for RNA synthesis, as well as permitting translation of the  
92 viral genome through interactions with the host translation initiation complex  
93 (16, 17). NS6 (also known as Pro, 3C-like) and NS7 (3DPol, RdRP) encode the 3C-  
94 like protease and RNA-dependent RNA polymerase respectively. The N-terminal  
95 3 proteins are less well characterized but are known to localize to cytoplasmic  
96 membranes. NS1/2 localises to the endoplasmic reticulum (18), and is  
97 implicated in viral persistence (19). NS3 has NTPase (20) and predicted RNA  
98 helicase activities, and was recently shown to interact with cholesterol-rich

99 membranes and cytoskeletal proteins (21). NS4, an orthologue of the  
100 picornavirus 3A protein, is localized to endosomes (18).

101

102 In this study we identify a mechanism by which noroviruses regulate viral  
103 protease cleavage of substrates during the viral replication cycle. We  
104 demonstrate how polyprotein processing controls protease localization and as a  
105 result, substrate accessibility, providing a mechanism for temporal regulation of  
106 protease cleavage of substrates. Furthermore, we have demonstrated that a  
107 comprehensive network of protein-protein interactions occur between the viral  
108 replicase proteins which also regulates protease and precursor localization.  
109 Finally we demonstrate that targeting an artificial substrate to the viral  
110 replication complex allows cleavage by authentic viral protease produced during  
111 infection. As the polyprotein includes key drug targets including the protease  
112 and polymerase (22, 23), an improved understanding of how these proteins  
113 function and are regulated throughout the viral life cycle may aid drug design  
114 and targeting.

115

## 116 **Results**

### 117 **The norovirus protease cleaves a cytoplasmic FRET substrate upon** 118 **transfection but not in the context of infection**

119 We sought to examine whether norovirus protease precursors play an important  
120 role in regulating substrate cleavage. To this aim, we compared the ability of the  
121 NS6 protease to cleave an artificial substrate when produced either as a fully  
122 processed form or produced during authentic viral replication. We have  
123 previously reported the generation of a FRET sensor for assessing norovirus

124 protease activity in live cells (7). This FRET sensor consists of CFP fused to YFP  
125 via a short linker region consisting of the P7 to P7' region of the MNV NS1/2-3  
126 cleavage site (Figure 1B). Whilst the expression of the mature protease resulted  
127 in efficient cleavage of the sensor, recapitulating our previous results, protease  
128 produced during viral infection showed extremely poor cleavage of the FRET  
129 sensor (Figure 1C). Western blotting for NS6 protein confirmed the presence of  
130 higher molecular weight isoforms of NS6 during infection (Figure 1C). These  
131 higher molecular weight proteins likely represent precursor forms of the  
132 protease, that we and others have observed previously (6, 7).

133

134 To examine whether poor cleavage of the FRET substrate during infection was  
135 due to a mismatch between substrate and protease localization, the localization  
136 of the protease and sensor was examined following transfection or infection of  
137 HeLa cells expressing the recently identified MNV receptor CD300lf (24, 25).  
138 Confocal microscopy revealed that the FRET sensor displayed diffuse nuclear  
139 and cytoplasmic localization, in both transfected and infected cells (Figure 1D).  
140 Whilst NS6 produced following transfection showed the same diffuse localization  
141 as the FRET sensor, in infected cells NS6 was located primarily to a large  
142 perinuclear puncta, consistent with previous observations (17) and most likely  
143 reflecting the position of the viral replication complex (RC). Given that the NS6  
144 antisera recognizes both mature and precursor forms of NS6, the localization  
145 pattern likely represents an averaged localization for both mature NS6 and NS6-  
146 containing precursors. These data suggest that substrate cleavage during  
147 infection is likely impacted by precursor and substrate localisation, and that the

148 context in which NS6 is expressed may affect the relative efficiency with which a  
149 substrate is cleaved.

150

151 **Targeting a cytoplasmic substrate to the replication complex permits**  
152 **efficient cleavage by NS6**

153 To determine if poor substrate-protease co-localization was responsible for the  
154 low levels of cleavage observed during infection we fused the FRET substrate to  
155 the C-terminus of NS7 in the context of full-length polyprotein, with either a WT  
156 (ORF1-FRET-WT) or a catalytically inactive protease domain (ORF1-FRET-  
157 H30A), in order to drive RC localization. Polyprotein processing was unaffected  
158 by fusion to the FRET sensor as the relative level of mature NS5 and NS5-  
159 containing precursors was similar to those generated from a MNV full-length  
160 infectious clone (MNV-FLC-WT, Figure 2A). The FRET sensor was efficiently  
161 cleaved in the context of the ORF1-FRET-WT construct, producing a ~70kDa  
162 NS7-CFP fusion product which was increased in mass when expressed in the  
163 context of ORF1 with a catalytically inactive protease (ORF1-FRET-H30A)  
164 (Figure 2A). We also observed that the fusion of the FRET sensor to ORF1  
165 resulted in RC localization as the CFP signal localized to the perinuclear region  
166 where the RC is known to form (Figure 2B). As expected, the RC localization of  
167 the YFP component of the FRET sensor was more pronounced when expressed in  
168 the context of ORF1 with a catalytically inactive protease (ORF1-FRET-H30A,  
169 Figure 2B). These data confirm that targeting of an artificial protease substrate  
170 to the RC allows for efficient cleavage of the substrate, adding to our hypothesis  
171 that protease localization and/or the context in which the protease is expressed,  
172 affects substrate cleavage efficiency.

173

174 **NS6-containing precursors are abundant and expressed from early times in**  
175 **infection**

176 The processing of the norovirus polyprotein at the five known cleavage sites  
177 would, in principle, result in the generation of 21 distinct protein products, of  
178 which 10 would be predicted to contain the protease domain (Table S1). To  
179 investigate precursor abundance, the presence of precursors during viral  
180 replication was examined by western blot (Figure 3). The identity of the  
181 observed precursors was assigned based on reactivity with either NS6 or NS5  
182 antisera, predicted molecular weight, comparing migration on SDS-PAGE to a  
183 transfected stable form of the individual precursor (Figure S1), and previously  
184 published observations (6). NS6- (Figure 3A) and NS5-containing precursors  
185 (Figure 3B) were observed as early as 3-4h post-infection, although the  
186 predominant NS6 containing precursor seen throughout infection was in fact  
187 NS4-6. The majority of the other predicted NS6-containing precursors could be  
188 identified including full-length NS1/2-7 (Figure 3A and B).

189

190 Although the NS6-7 precursor was previously suggested to be the major form of  
191 NS6 contributing to norovirus polyprotein cleavage based on increased activity  
192 *in vitro* compared to mature NS6 (9), our data would indicate that it is produced  
193 at relatively low levels. Mature, fully-processed NS6 appears to be the major  
194 form of NS6 present over the course of infection. Infectious virus production  
195 occurs from 5h post-infection onwards (Figure 3C) at times when the mature  
196 form of NS6 and the NS4-6 and NS4-7 precursors are the major forms of NS6  
197 present at detectable levels.



198

199 To examine if the localization of NS6 was influenced by the context of the  
200 precursors in which it is contained, we used crude fractionation to separate cells  
201 into cytoplasmic and membrane-associated fractions (Figure 3D). The  
202 distribution of the soluble cytoplasmic and membrane-associated protein  
203 marker proteins GAPDH and VDAC confirmed successful fractionation (27). The  
204 MNV NS1/2, NS3 and NS4 proteins are known to be membrane associated (18,  
205 21), and our results confirmed NS3 was restricted to the membrane fraction. NS7  
206 associates with the RC, but lacks a predicted trans-membrane domain and could  
207 be found in both fractions. The distribution of NS5-containing precursors was  
208 used as a surrogate for NS6 due to the significant overlap with NS6-containing  
209 precursors and the greater sensitivity of the antisera. High molecular weight  
210 precursors containing NS1/2, NS3 or NS4, were absent from the soluble  
211 cytoplasmic fraction. In particular the most abundant higher molecular weight  
212 precursor (NS4-7) was exclusively isolated in the membrane fraction. Proteins  
213 present in the soluble cytoplasmic fraction included fully processed NS5, a  
214 protein which may represent NS4/5 or NS5/6, and NS5-7. NS4-6 was present  
215 but significantly less abundant in the cytoplasmic than membrane fraction. Some  
216 <15kDa proteins were identified in the membrane fraction which may represent  
217 modified forms of NS5, or breakdown products. Taken together these data  
218 confirm that precursor forms of the norovirus replicase proteins impart distinct  
219 patterns of localization on polyprotein constituents, which can differ from their  
220 fully processed forms.

221

222 **Precursor forms of the norovirus protease are proteolytically active in a**  
223 **cell-free system but show variable activity in cells**

224 As NS6-containing precursors showed variation in their localization in infected  
225 cells, we hypothesized that this would also result in variation in their ability to  
226 cleave substrates. To test this hypothesis, active, stable forms of these precursors  
227 were generated by alanine mutagenesis of the P1 residue (28) at each cleavage  
228 site. Of the 21 polyprotein products that can be generated by NS6-mediated  
229 polyprotein cleavage, ten contain NS6 (Figure 4A). All protease-containing  
230 precursors could be readily expressed *in vitro* and in transfected cells, although  
231 to varying degrees (Figure B and C). Expression in both systems yielded proteins  
232 of the expected molecular weights (Figure 4A, Table S1). We next examined the  
233 ability of each precursor to cleave two different substrates; the ORF1-FRET-  
234 H30A substrate, and poly-A-binding protein (PABP), a cellular protein involved  
235 in translation that we previously identified as being cleaved by NS6 during  
236 norovirus infection (14). When unlabeled *in vitro* translated norovirus protease-  
237 containing precursor proteins were incubated with *in vitro* translated <sup>35</sup>S-  
238 methionine labelled PABP, cleavage products were observed (Figure 4D). As  
239 expected, cleavage products were not observed upon incubation of PABP with  
240 catalytically inactive protease (H30A). It is noteworthy that only a fraction of the  
241 PABP produced *in vitro* was cleaved, fitting with our previous observations (14).  
242 However, when the protease precursors and FLAG-tagged PABP were co-  
243 expressed in cells, a C-terminal PABP cleavage product, detected by virtue of the  
244 C-terminal FLAG tag, was only observed when co-expressed with NS6, NS6-, NS5-  
245 6 and NS5-7(Figure 4E). The ability of the precursors to cleave a protease  
246 substrate that was localized to the viral replication complex was examined by co-

247 transfection of cells with plasmids expressing the precursors and the ORF1-  
248 FRET-H30A FRET substrate (Figure 4F). FRET substrate cleavage was observed  
249 in all cases except when co-transfected with a catalytically inactive mature  
250 protease. In a limited number of cases, in addition to the fully cleaved FRET  
251 substrate, additional larger CFP/YFP containing precursors were observed with  
252 some protease-containing precursors that were not detected following co-  
253 expression with the mature protease. Together these data highlight that the  
254 context in which NS6 is expressed and the localization of any given substrate,  
255 alters the relative efficiency of substrate cleavage.

256

257 **NS6 precursor localization is determined by fusion of NS6 with membrane-**  
258 **bound polyprotein components and intra-replication complex interactions.**

259 To examine how the context in which NS6 is expressed affects its localization we  
260 examined the localization of each precursor in HeLa cells expressing the MNV  
261 receptor (CD300lf) by confocal microscopy (Figure 5). The mature fully  
262 processed form of NS6 and the NS5-6 precursor showed predominantly  
263 cytoplasmic localization, with some nuclear localization. The localization of the  
264 other precursors was more varied. NS6-7 also showed some degree of nuclear  
265 localization but was largely localized to the cytoplasm. NS5-7 was exclusively  
266 localized to the cytoplasm but also formed some cytoplasmic puncta. NS4-6 and  
267 NS4-7 showed reticular localization, reminiscent of RC localization. A detailed  
268 analysis of the localization of the longer precursors was confounded by the  
269 relatively poor expression and toxicity of these precursors following transfection  
270 however a limited number of cells could be visualized by confocal microscopy  
271 Figure S2. The NS3-containing precursors NS3-6 and NS3-7 localized to small,

272 spherical cytoplasmic membranous structures whereas the NS1/2-6 and NS1/2-  
273 7 precursors were largely cytoplasmic, with some cytoplasmic, possibly  
274 membrane associated puncta, observed on the case of NS1/2-6. In summary, we  
275 found that the precursors containing NS4 and NS3 imparted membrane  
276 localization on NS6, consistent with these proteins localizing to the viral RC.  
277 These data were also consistent with the poor efficiency with which these  
278 precursors cleave PABP (Figure 4E).

279

280 Previous studies indicate that NS7 localizes to the viral RC suggesting in the  
281 context of viral infection, suggesting that protein-protein interactions between  
282 the viral replicase proteins likely also affects polyprotein localization. To test this  
283 hypothesis we examined the impact of viral infection on the localization of each  
284 NS6 containing precursor (Figure 5). Whilst the localization of mature NS6, NS4-  
285 6 and NS4-7 was not altered upon infection, the NS5-6, NS6-7 and NS5-7  
286 precursors were redistributed to the viral RC. In the case of NS5-6, whilst  
287 cytoplasmic and nuclear localization was still visible, there was clear enrichment  
288 at the viral RC as evident by colocalization with viral dsRNA. NS6-7 and NS5-7  
289 showed a more pronounced relocalization following infection, with the vast  
290 majority of these precursors localized to the RC.

291

## 292 **Identification of protein-protein interactions between norovirus proteins**

293 The relocalization of NS7-containing precursors to the viral RC upon infection  
294 highlighted the potential role of interactions between viral components to tether  
295 NS6-containing precursors to the viral RC. We therefore examined the network  
296 of interactions between norovirus replicase proteins in order to determine

297 which of these might impact on precursor localization. To this aim we used the  
298 LUMIER system (29, 30) to map all the interactions between individual MNV  
299 proteins (Figure 6 and S3). A similar analysis was also performed for GI.1 and  
300 GII.4 human norovirus (Figures S4 and S5) to identify conserved intra-RC  
301 protein-protein interactions. Strong self-association was observed with NS1/2,  
302 NS4, NS7, and the major and minor capsid proteins VP1 and VP2. The N-terminal  
303 components of the polyprotein NS1/2, NS3 and NS4 interacted with each other,  
304 all of which have previously been shown to localize to cytoplasmic membranes in  
305 order to initiate RC formation for the related feline calicivirus (31). As expected,  
306 a robust interaction between the VP1 and VP2 capsid proteins was seen along  
307 with VP1-NS7 and NS1/2-NS7 interactions. These latter interactions fit with our  
308 previous observations of the impact of VP1 and NS1/2 on polymerase function  
309 (32). A interaction was also observed between NS5 and NS7, in keeping with the  
310 role of NS5 in serving as a protein primer for RNA synthesis. These data suggest  
311 that the redistribution of the NS6 containing precursors NS5-6, NS6-7 and NS5-7  
312 to the viral RC is therefore the likely result of interactions between NS1/2 and  
313 NS7, which in the case of NS5-6 could occur via the formation of a NS5-  
314 6:NS7:NS1/2 complex.

315

316 **Fusion to N-terminal replication complex components permits effective**  
317 **cleavage of fused substrates by the norovirus protease *in trans*.**

318 To examine the minimum features requires for the correct localization of a  
319 substrate to the viral RC and its subsequent cleavage, a range of truncation and  
320 deletion mutants in the ORF1-FRET-H30A construct were generated to  
321 determine which components were necessary and sufficient for cleavage *in trans*

322 (Figure 7A). Active RC localized viral protease was provided *in trans* by co-  
323 expressing the FRET substrates with a MNV full length cDNA clone with either a  
324 wild-type (MNV-FLC) or catalytically inactive protease (MNV-H30A).

325

326 The N-terminal truncations all displayed some degree of cleavage with the NS7-  
327 FRET substrate being cleaved the least efficiently (Figure 7B). Whilst the fusion  
328 of NS7 alone to a substrate was sufficient to allow *trans* cleavage, C-terminal  
329 truncations demonstrated that NS7 was not essential as the NS1/2-6, NS1/2-5  
330 and NS1/2-4 fusions were all cleaved efficiently (Figure 7C). The NS1/2-3 and  
331 NS1/2 fusions showed progressively poorer cleavage of the fused substrate, with  
332 negligible cleavage observed with the latter.

333

334 Finally, the impact of internal deletions on FRET substrate cleavage was  
335 examined (Figure 7D). The  $\Delta$ NS4 mutant showed a minor defect in cleavage,  
336 which may have been due to the chimeric nature of the NS3/5 cleavage site  
337 generated by the deletion. Single deletions of NS3, NS4, NS5 and NS6 all  
338 permitted efficient cleavage. From this data it is apparent that no single region  
339 of the polyprotein was essential for cleavage of a fused substrate, but that several  
340 regions of the polyprotein (NS1/2-4 or NS7) appeared sufficient. These regions  
341 matched those identified earlier as sufficient for RC localization (Figure 6), either  
342 directly, or through interactions with other viral RC components.

343

344 **Replication complex localization of FRET substrates permits cleavage by**  
345 **the norovirus protease in the context of infection**

346 Having identified the minimal regions required for RC-targeting of fused  
347 substrate by polyprotein and precursors provided *in trans*, we predicted that  
348 these fusions would permit the cleavage of said substrate by MNV in the context  
349 of infection. The full length ORF1-FRET-H30A fusion and three of the deletion  
350 constructs (NS7, NS1/2-4, NS1/2) were chosen for further characterisation.

351

352 As anticipated, the ORF1-FRET-H30A fusion was efficiently cleaved during viral  
353 infection at both 9h (Figure 8A) and 12h (Figure 8B) post-infection. NS1/2-4-  
354 FRET was mostly cleaved at 9h post infection and showed full cleavage by 12h  
355 post infection. This NS1/2-4 fusion represented the most efficiently cleaved of  
356 the truncated substrates. The NS1/2-FRET fusion showed poor cleavage at 9h  
357 post-infection (Figure 8A), consistent with our previous observations (Figure  
358 7C), but cleavage was significantly increased by 12h post infection. The NS7-  
359 FRET fusion remained largely uncleaved at both 9h or 12h post-infection (Figure  
360 8A/B). Combined, these data highlight that substrate accessibility and protease  
361 localization, may be at least one mechanism by which norovirus temporally  
362 regulates the cleavage of any given substrate.

363

## 364 **Discussion**

365 The generation of viral replicase components from a single large polyprotein is a  
366 mechanism conserved in many +ssRNA viruses including noroviruses. The  
367 regulated production of viral precursors, often with distinct functions, enables  
368 the expansion of functional coding capacity without a concomitant increase in  
369 viral genome size.

370

371 In the case of noroviruses, 21 possible precursors can be generated by NS6  
372 cleavage of the polyprotein, ten of which contain the protease. In this study we  
373 confirm that all ten of these protease-containing precursors represent active  
374 forms of the protease, though spatial sequestration of a number of these  
375 precursor forms controls their substrate accessibility. Due to similarity with  
376 other caliciviruses, where the protease and polymerase (NS6-7) remain  
377 uncleaved, NS6-7 had previously been suggested to represent the dominant form  
378 of NS6 proteolytic activity (33). In support of this hypothesis, NS6-7 retains both  
379 proteolytic and polymerase activity whilst fused (9, 10), can more efficiently  
380 nucleotidylate NS5 than NS7 alone (34), and NS6-7 has higher proteolytic  
381 activity than NS6 alone *in vitro* (33). However, our data questions the extent to  
382 which this precursor may contribute to these activities as we identified the NS4-  
383 6 precursor as the most abundant precursor form produced over the course of  
384 an infection. We also found that NS6-7 does not localize directly to the viral RC,  
385 but instead requires other viral factors such as NS1/2 for this localization. In  
386 addition, we have previously shown that the NS6-7 cleavage site is efficiently  
387 cleaved, consistent with the extremely low levels of NS6-7 observed throughout  
388 our timecourse experiments (7). Whilst abundant, the diffuse localization of  
389 fully cleaved NS6 would result in lower concentrations of this form of the  
390 protease both within the replication complex and throughout the cytoplasm as a  
391 whole. This would prevent efficient cleavage by NS6 until very late times post-  
392 infection. We would therefore hypothesise that NS4-6 represents the form of the  
393 protease responsible for the majority of *trans* polyprotein cleavage observed  
394 during norovirus infection. The cytoplasmic localization of mature NS6 could  
395 provide a mechanism of controlling the levels of viral protein cleavage by



396 expelling excess protease from the RC, and thus avoiding runaway levels of  
397 proteolysis as polyprotein abundance increases. In addition, this may allow for  
398 the temporal regulation of the cleavage of certain cellular substrates. It should  
399 however be noted that whilst this study primarily focuses on *trans*-cleavage by  
400 the protease, *cis*-cleavage most likely plays an important role in norovirus  
401 polyprotein processing and will require further research.

402

403 In a recent study we identified PABP as a cellular substrate of the norovirus  
404 protease (14). Cleavage of PABP at late times post-infection partially accounted  
405 for inhibition of host translation and diminished production of innate immune  
406 regulatory proteins during MNV infection. Transfection of a non-cleavable form  
407 of PABP resulted in reduced in MNV replication (14). The mechanism behind the  
408 temporal regulation of PABP cleavage is unknown as mature protease is  
409 produced early in infection. From the data presented here, the shorter, non-  
410 membrane associated forms of NS6 more effectively cleaved PABP. PABP is a  
411 cytoplasmic protein much like the unfused FRET substrate. Whilst the fully-  
412 cleaved NS6 is the most abundant form of the protease for much of infection, its  
413 diffuse localization would be expected to result in lower concentrations of total  
414 protease in the cytoplasm, compared with the replication complex which would  
415 also possess the membrane-associated protease precursors. This hypothesis is  
416 consistent with the strong replication complex localization observed using anti-  
417 NS6 antisera in MNV-infected cells. The concentration of NS6 activity within the  
418 RC until late times post-infection may represent the means by which PABP  
419 cleavage is temporally regulated, with PABP cleavage only observed once  
420 cytoplasmic NS6 concentrations have reached a threshold level.

421

422 A network of interactions between viral replication complex proteins, their  
423 precursor forms, and a range of cellular proteins is required to establish the  
424 formation of a functional viral RC (35, 36). The interactions between the feline  
425 calicivirus replicase proteins have been previously investigated by our group  
426 using the yeast two-hybrid system (37). In the current study we extended this to  
427 include noroviruses, identifying a network of evolutionarily conserved  
428 interactions. Surprisingly, we observed no direct interactions with the mature  
429 NS6 and any other viral proteins. Further studies are required to determine if  
430 this is due to confounding effects of the additional sequences added for the  
431 LUMIER assay. However, NS6 has the potential to interact with NS1/2, NS5 and  
432 VP1 when part of the NS6-7 precursor, and NS4-6 precursors would also be  
433 expected to interact with NS1/2 and NS3 through interactions with the NS4  
434 component of the precursor. Several distinctions between norovirus protein-  
435 protein interactions and the previous calicivirus protein interaction study were  
436 observed. FCV p76 (equivalent to NS6-7) weakly interacted with the minor  
437 capsid protein (37), whereas no interactions between VP2 and the non-  
438 structural proteins were observed for the noroviruses. For noroviruses NS1/2  
439 appears to play the key role in binding a number of the non-structural proteins  
440 together by interacting with NS3, NS4 and NS7, with FCV p32 playing a similar  
441 role (37). However the self interactions of NS3 and NS4 observed in the LUMIER  
442 data were not conserved in their FCV p39 and P40 equivalents (37).

443

444 Cleavage of a subset of FRET fusion substrates showed some variation between  
445 infection and transfection-based *trans*-cleavage studies. NS1/2 fusions, unlike

446 NS1/2-4 fusions, were poorly cleaved following co-transfection with active  
447 protease, but were subsequently cleaved, albeit at very late times, in the context  
448 of MNV infection. However, the superior cleavage of the NS1/2-4 fusion can be  
449 understood in the context of the LUMIER data which highlights interactions  
450 between NS1/2, NS3 and NS4. Both substrate and protease expression in the  
451 trans-cleavage assay system is driven to high levels by T7-driven expression. In  
452 particular, this would be expected to produce significantly more NS1/2-FRET in  
453 this system, without a concomitant increase in the NS3 and NS4, an issue not  
454 present with the NS1/2-4-FRET substrate. This aberrant stoichiometry between  
455 NS1/2, NS3 and NS4 may result in not all of the NS1/2-FRET substrate  
456 integrating successfully into the RC. At the lower levels of substrate expression  
457 achieved following electroporation into BV-2 cells, a higher proportion of the  
458 NS1/2-FRET substrate may be incorporated into the RC, albeit at late times post  
459 infection resulting in the cleavage of this substrate at 12h but not 9h post-  
460 infection.

461

462 The alphaviruses represent the best-characterised example of polyprotein  
463 cleavage driving the staging of events in the viral life cycle throughout  
464 replication (13). Compared with noroviruses, the alphaviruses have a simpler  
465 polyprotein with two alternate forms P123 and P1234 produced by stopcodon  
466 readthrough. The successive processing of this polyprotein at the P34, P12 and  
467 P23 junctions respectively controls a shift in viral transcription from negative to  
468 positive sense transcription (13). Accumulation of the protease, and control of  
469 cis- and trans-cleavage activity throughout infection drives these shifts in

470 precursor populations and thus yields a mechanism for temporal regulation of  
471 viral replication.

472

473 Whilst our current understanding of the roles of norovirus precursor proteins  
474 and polyprotein cleavage is less developed than for the alphaviruses, the  
475 localization, interactions, and cleavage patterns of the various protease  
476 precursors gives rise to a basic mechanistic model for how polyprotein cleavage  
477 could regulate some aspects of the norovirus life cycle. Following release of the  
478 viral genome into the cytoplasm, pioneer rounds of translation of the  
479 polyprotein from the incoming genome occur. The synthesis of viral negative  
480 sense RNA is thought to occur via a *de novo* initiation mechanism that is  
481 enhanced by an interaction between the viral capsid protein VP1 and the  
482 polymerase NS7 (38–40). The production of viral VPg-linked positive sense RNA  
483 can then occur. Analyses of NS5/VPg-linked RNA produced in norovirus infected  
484 cells have to date only found fully processed NS5 linked to RNA (16). However,  
485 experiments with the distantly-related picornaviruses showed that in cases  
486 where the NS5-6 equivalent (3BC) cleavage site was mutated, viable virus was  
487 obtained and 3BC could be identified bound to the RNA (41). This suggests that  
488 the priming functions of NS5 may not require the fully processed protein.  
489 However our group and others have confirmed that the fully processed NS5 is  
490 most efficient at binding to eukaryotic initiation factor proteins and therefore  
491 translation of viral proteins (16, 42). For example, Leen and colleagues  
492 demonstrated that the disruption of NS5-6 cleavage abolished the interaction of  
493 NS5 with the eIF4G HEAT domain (42). Regulation of the levels of NS5-  
494 containing precursors may therefore provide a mechanism of temporal

495 regulation of viral RNA synthesis, due to the progression in precursor abundance  
496 from dominant NS4-6 and NS4-7 forms at early times, to later times when the  
497 fully cleaved and shorter precursors (NS4-5, NS5-6) are more abundant.  
498 Negative sense RNA synthesis would be anticipated to dominate until sufficient  
499 NS5 is present in a suitable (presumably shorter) precursor form to permit sense  
500 transcription. In addition this temporal regulation of the NS5 precursor state  
501 may also control levels of translation, though how distinct the NS5 cleavage state  
502 requirements for efficient translation are from those for positive sense RNA  
503 synthesis remains to be fully elucidated.

504

505 In conclusion, our study identified a mechanism by which noroviruses may  
506 regulate protease activity. This is achieved by both the temporal control of  
507 precursor production and the spatial regulation this imparts either directly or  
508 indirectly via intra-RC protein-protein interactions with other viral replicase  
509 components. Membrane tethering keeps precursors associated with the RC,  
510 serving to concentrate their activity and ensure efficient cleavage of viral or RC-  
511 associated substrates. At late times shorter forms of the protease lacking either a  
512 transmembrane fusion partner such as NS4, or the ability to interact indirectly  
513 with the replication complex via NS7 dominate. These forms are no longer  
514 sequestered at the RC and are capable of cleaving cytoplasmic substrates. This  
515 understanding of which forms of the protease are most active throughout  
516 infection, and their regulation may serve to guide future drug design efforts  
517 against the protease and other RC components.

518

519 **Methods**

520 Cells and Viruses

521 Murine BV-2 cells were used for infection experiments (25); human HeLa cells  
522 expressing the murine norovirus receptor (HeLa-CD300lf) and hamster BSR-T7  
523 cells were used for transfection and microscopy experiments. Experiments using  
524 fowlpox T7-mediated expression of the polyprotein, or polyprotein fusions from  
525 the MNV reverse genetics system were performed in BSR-T7 cells as described  
526 (43). LUMIER assays were performed in unmodified HEK-293T cells.

527

528 All infections were performed with murine norovirus strain CW1 (43).  
529 Preparation and titration of virus stocks by TCID<sub>50</sub> was performed as described  
530 (44). All infections were performed at high multiplicity of infection (MOI: 10  
531 TCID<sub>50</sub>/cell). Cells were cultured in DMEM media supplemented with  
532 penicillin/streptomycin, 10% serum, and were maintained at 37°C, 5% CO<sub>2</sub>. With  
533 the exception of BV-2 cells, transfections were performed in antibiotic-free  
534 media using Lipofectamine 2000 (Life Technologies) as per the manufacturer's  
535 recommendations. BV-2 cells were electroporated with *in vitro* transcribed RNAs  
536 using the Neon electroporation system (Life Technologies) as described  
537 previously (45).

538

539 Plasmids and molecular cloning

540 The FRET plasmid used was essentially as described in (7). To avoid difficulties  
541 in PCR amplification of the FRET sensor (CFP-cleavable linker-YFP) due to high  
542 sequence identity between the CFP and YFP coding sequences, this was re-cloned  
543 using a modified YFP nucleotide sequence whilst maintaining the original linker

544 and protein sequences (sequence available upon request). The generation of the  
545 FLAG-PABP plasmid has been described previously (14).

546

547 N-terminally FLAG-tagged stable forms of all the potential NS6 containing  
548 precursors were generated in pTriex1.1 (Novagen) using pT7 MNV 3'RZ (43) as a  
549 template. In each precursor, all the known cleavage sites had their P1 residue  
550 mutated to alanine to inhibit cleavage. Cloning was accomplished by Gibson  
551 assembly into the NcoI and XhoI restriction sites of pTriex1.1.

552

553 The pT7 MNV 3'RZ plasmid used has been described previously (43), and  
554 represents a full-length clone of the MNV CW1 strain (DQ285629), and is  
555 referred to as MNV-FLC in the manuscript. The proteolytically inactive form of  
556 this plasmid was generated by alanine mutagenesis of His30 within the NS6  
557 sequence (MNV-H30A). The full-length FRET fusion plasmid (ORF1-FRET-WT)  
558 and inactive mutant (ORF1-FRET-H30A) were derived from pT7 MNV 3'RZ and  
559 had the subgenomic region deleted and the FRET sensor fused to NS7 in place of  
560 the NS7 stop codon. A poly(A) tail was included between the stop codon of the  
561 FRET sensor and the HDV ribozyme. This permitted expression of this protein by  
562 transfection of the plasmid into BSR-T7 cells infected with fowlpox-T7, or by  
563 electroporation of *in vitro* transcribed RNA into BV-2 cells.

564

565 The various deletion constructs based on ORF1-FRET-H30A were generated by a  
566 Gibson assembly approach. N-terminal deletions all incorporated the methionine  
567 from NS1/2. C-terminal deletions fused the FRET sensor to the C-terminal-most  
568 protein which had its C-terminal P1 residue directly joining the FRET sensor

569 mutated to alanine to prevent off-target cleavage between the C-terminal protein  
570 and CFP. For internal deletions, the sequence deleted extended from the P1' of  
571 the N-terminal cleavage site to the P1 of the C-terminal cleavage site of the  
572 protein of interest resulting in the production of a chimeric cleavage site. For  
573 example, in the NS3 deletion mutant, the cleavage site between NS1/2 and NS4  
574 consists of the P side residues of the NS1/2-NS3 cleavage site and the P' side  
575 residues of the NS3-NS4 cleavage site.

576

577 All MNV and genogroup I and II HuNoV genes encoding individual proteins were  
578 cloned from MNV-1 (strain CW1) and Norwalk (GI.1) into the Gateway®  
579 pDONR207 entry plasmid, and MD145 (GII.4) strains into the Gateway®  
580 pDONR221 entry plasmid. N-terminal Renilla reniformis Luciferase (RL) and *S.*  
581 *aureus* protein A (PA) fusion protein plasmids were generated in pcDNA3-RL-  
582 GW and pTrex-Dest30-PA expression vectors respectively using the Gateway®  
583 Clonase® II enzyme recombination system (Invitrogen). The negative control  
584 plasmid consisted of a double protein A fusion protein (PA-PA). Validation of  
585 LUMIER assays was performed using positive control plasmids consisting of RL-  
586 c-Jun and PA-c-Fos fusion proteins.

587

#### 588 Antibodies

589 Recombinant NS6 from GI.1, GII.4 and MNV was prepared in *E. coli* as described  
590 previously (46), combined, and used as antigen for preparation of rabbit  
591 polyclonal antisera. The resulting sera was affinity purified against MNV NS6.  
592 NS3, NS5 (VPg) and NS7 antibodies were prepared in our laboratory previously,  
593 and anti-NS5 was affinity purified against Cherry-tagged MNV NS5. Antisera to



594 GAPDH (Ambion), VDAC (Abcam), PABP (Cell Signaling), GFP (Abcam) were  
595 purchased from the indicated vendors.

596

#### 597 Western blotting

598 Cells were lysed in RIPA buffer (50mM Tris pH8, 150mM NaCl, 1mM EDTA, 1%  
599 Triton X-100, 0.1% SDS) and protein concentrations determined by BCA assay  
600 (Pierce). Samples were then mixed with SDS sample loading buffer. We and  
601 others (Eoin Leen, personal communication) have observed that heating samples  
602 containing NS6, or some of the other NS6-containing precursors can cause these  
603 to precipitate in the sample buffer. As such blotting was performed by mixing the  
604 sample with SDS sample loading buffer and then immediately loading the sample  
605 onto the gel without heating. Samples were supplemented with RNase cocktail,  
606 and the use of lower sample concentrations (3-5µg/well) also helped prevent  
607 smearing. Samples were run on SDS-PAGE gels, transferred to nitrocellulose  
608 membranes, blocked and probed by standard protocols. Detection was  
609 accomplished using IR-dye 680 or 800-conjugated secondary antibodies  
610 followed by imaging on a Li-Cor Odyssey imager.

611

#### 612 Confocal Microscopy

613 Cells were grown on glass coverslips, transfected, and infected as indicated  
614 above. At the relevant timepoint, the coverslips were washed with cold PBS,  
615 fixed in 4% paraformaldehyde in PBS for 10 min on ice, and permeabilized with  
616 PBS containing 0.2% Triton X-100 and 4% paraformaldehyde for an additional  
617 10 min at room temperature. Aldehyde groups were quenched with 0.2 M  
618 glycine in PBS. Subsequent antibody incubations and washing steps followed

619 standard protocols and have been described previously (47). Alexa-fluor  
620 fluorescent secondary antibodies were obtained from Molecular Probes and used  
621 at the manufacturers recommended dilution. Coverslips were mounted on glass  
622 slides using Mowiol supplemented with DAPI. Imaging was performed on a Leica  
623 Sp5 confocal microscope using a 63x oil objective. Image analysis was performed  
624 in the Leica Lite software (Leica Microsystems).

625

#### 626 *In vitro* translation reactions

627 *In vitro* translation assays were performed with 1ug template plasmid and the  
628 T7 coupled *in vitro* transcription-translation kit (Promega). Reactions were  
629 either performed with <sup>35</sup>S-methionine labeling, or unlabeled as indicated in the  
630 text. Half-size reactions (25μl) reactions were incubated at 30°C for 1h 30m. At  
631 the end of the incubation the reactions were mixed with an equal volume of  
632 Trans-stop buffer (10mM EDTA, 100ng/ml RNase A) and incubated at room  
633 temperature for 30m.

634

635 For experiments assessing cleavage of <sup>35</sup>S-methionine labeled substrate by  
636 unlabeled protease/precursors, after addition of trans-stop, 5μl of labeled  
637 substrate was mixed with 15μl of unlabeled protease. This was then mixed with  
638 4 volumes (80μl) of protease assay buffer (10mM HEPES pH7.6, 0.1% CHAPS,  
639 10mM DTT and 30% glycerol (46)) and incubated at 37°C for 48 hours.

640

641 All samples were then combined with reducing SDS-PAGE loading buffer,  
642 resolved on a denaturing 17.5% SDS-PAGE gel, dried, and imaged using a  
643 Typhoon FLA 7000 phosphorimager.

644

645 LUMIER assay

646 All assays were performed in quadruplicate. 96 well plates containing  $5 \times 10^4$   
647 HEK-293T cells per well in 100 $\mu$ l of DMEM supplemented with 15% FBS were  
648 seeded 12h prior transfection. Co-transfections were performed with 60ng of  
649 combined bait and prey plasmids with 0.3 $\mu$ l lipofectamine 2000 (Invitrogen) in  
650 30 $\mu$ l Opti-MEM I (Gibco) per well. After 24h incubation, cells were lysed for 10  
651 min at 4°C with shaking using 30 $\mu$ l of ice-cold LUMIER lysis buffer (PBS pH 7.4  
652 (Mg/Ca free), 1% Triton X100, 0.1% BSA, 1mM DTT) with 1% Halt EDTA-free  
653 Protease/Phosphatase Inhibitor Cocktail (Pierce) and benzonase nuclease  
654 (Novagen)) Each supernatant was transferred in a 96 well V-bottom plate, and  
655 then centrifuged at 2000 x *g* for 15 min at 4°C. 20 $\mu$ l of each supernatant was  
656 retained and transferred to a new white flat bottom plate.

657

658 Dynabeads M280 sheep anti-rabbit IgG-coated magnetic beads (Invitrogen) were  
659 washed 3 times with the LUMIER washing buffer (PBS pH 7.4 (Mg/Ca free), 0.1%  
660 BSA, 1mM DTT, 1mM ATP) then coupled overnight at 4°C with a polyclonal anti-  
661 protein A rabbit antibody (Sigma-Aldrich). The beads were washed 4 times with  
662 LUMIER washing buffer. 2 $\mu$ l of beads in 30 $\mu$ l of LUMIER washing buffer was  
663 added to each well containing the lysate supernatants.

664

665 After 90 min of incubation on shaker at 4°C, 60 $\mu$ l of LUMIER washing buffer was  
666 added to each plate and mixed. After transferring 10 $\mu$ l of supernatant per well to  
667 new 96-well white plates plates to measure unbound activity, IP plates were  
668 washed six times with LUMIER washing buffer. Renilla luciferase activity was

669 measured in both IP and unbound plates on a GloMax luminometer (Promega).

670 Data were normalised to background ratios and Robust Z-score (RZ) calculated

671 (48).

672

### 673 **Acknowledgements**

674 IG is supported by a Wellcome Trust Senior Fellowship (WT097997MA). This

675 work was also supported by the Cambridge NIHR BRC cell phenotyping hub, who

676 are thanked for their assistance with microscopy.

677

678

## 679 **References**

- 680 1. Jones, M. K., Watanabe, M., Zhu, S., Graves, C. L., Keyes, L. R., Grau, K. R.,  
681 Gonzalez-Hernandez, M. B., Iovine, N. M., Wobus, C. E., Vinje, J., Tibbetts, S.  
682 A., Wallet, S. M., and Karst, S. M. (2014) Enteric bacteria promote human  
683 and mouse norovirus infection of B cells. *Science*. **346**, 755–759
- 684 2. Ettayebi, K., Crawford, S. E., Murakami, K., Broughman, J. R., Karandikar, U.,  
685 Tenge, V. R., Neill, F. H., Blutt, S. E., Zeng, X.-L., Qu, L., Kou, B., Opekun, A. R.,  
686 Burrin, D., Graham, D. Y., Ramani, S., Atmar, R. L., and Estes, M. K. (2016)  
687 Replication of human noroviruses in stem cell–derived human enteroids.  
688 *Science*. **353**, 1387–1393
- 689 3. Karst, S. M., Wobus, C. E., Lay, M., Davidson, J., and Virgin, H. W. (2003)  
690 STAT1-dependent innate immunity to a Norwalk-like virus. *Science*. **299**,  
691 1575–8
- 692 4. Karst, S. M., and Wobus, C. E. (2015) Viruses in Rodent Colonies: Lessons  
693 Learned from Murine Noroviruses. *Annu. Rev. Virol.* **2**, 525–548
- 694 5. Karst, S. M., and Tibbetts, S. A. (2016) Recent advances in understanding  
695 norovirus pathogenesis. *J. Med. Virol.* **88**, 1837–1843
- 696 6. Sosnovtsev, S. V., Belliot, G., Chang, K.-O., Prikhodko, V. G., Thackray, L. B.,  
697 Wobus, C. E., Karst, S. M., Virgin, H. W., and Green, K. Y. (2006) Cleavage  
698 map and proteolytic processing of the murine norovirus nonstructural  
699 polyprotein in infected cells. *J. Virol.* **80**, 7816–31
- 700 7. Emmott, E., Sweeney, T. R., and Goodfellow, I. (2015) A Cell-Based FRET  
701 Sensor Reveals Inter- and Intragenogroup Variation in Norovirus Protease  
702 Activity and Polyprotein Cleavage. *J. Biol. Chem.* **290**, jbc.M115.688234
- 703 8. Cameron, C. E., Oh, H. S., and Moustafa, I. M. (2010) Expanding knowledge

- 704 of P3 proteins in the poliovirus lifecycle. *Future Microbiol.* **5**, 867–81
- 705 9. Scheffler, U., Rudolph, W., Gebhardt, J., and Rohayem, J. (2007) Differential  
706 cleavage of the norovirus polyprotein precursor by two active forms of the  
707 viral protease. *J. Gen. Virol.* **88**, 2013–8
- 708 10. Belliot, G., Sosnovtsev, S. V, Chang, K.-O., Babu, V., Uche, U., Arnold, J. J.,  
709 Cameron, C. E., and Green, K. Y. (2005) Norovirus proteinase-polymerase  
710 and polymerase are both active forms of RNA-dependent RNA polymerase.  
711 *J. Virol.* **79**, 2393–403
- 712 11. Wei, L., Huhn, J. S., Mory, A., Pathak, H. B., Sosnovtsev, S. V, Green, K. Y., and  
713 Cameron, C. E. (2001) Proteinase-polymerase precursor as the active form  
714 of feline calicivirus RNA-dependent RNA polymerase. *J. Virol.* **75**, 1211–9
- 715 12. Pathak, H. B., Oh, H. S., Goodfellow, I. G., Arnold, J. J., and Cameron, C. E.  
716 (2008) Picornavirus genome replication: roles of precursor proteins and  
717 rate-limiting steps in oril-dependent VPg uridylylation. *J. Biol. Chem.* **283**,  
718 30677–88
- 719 13. Shirako, Y., and Strauss, J. H. (1994) Regulation of Sindbis virus RNA  
720 replication: uncleaved P123 and nsP4 function in minus-strand RNA  
721 synthesis, whereas cleaved products from P123 are required for efficient  
722 plus-strand RNA synthesis. *J. Virol.* **68**, 1874–85
- 723 14. Emmott, E., Sorgeloos, F., Caddy, S. L., Vashist, S., Sosnovtsev, S., Lloyd, R.,  
724 Heesom, K., Locker, N., and Goodfellow, I. (2017) Norovirus-Mediated  
725 Modification of the Translational Landscape via Virus and Host-Induced  
726 Cleavage of Translation Initiation Factors. *Mol. Cell. proteomics.* **16**, S215–  
727 S229
- 728 15. Thorne, L. G., and Goodfellow, I. G. (2014) Norovirus gene expression and

- 729 replication. *J. Gen. Virol.* **95**, 278–91
- 730 16. Chung, L., Bailey, D., Leen, E. N., Emmott, E. P., Chaudhry, Y., Roberts, L. O.,  
731 Curry, S., Locker, N., and Goodfellow, I. G. (2014) Norovirus translation  
732 requires an interaction between the C Terminus of the genome-linked viral  
733 protein VPg and eukaryotic translation initiation factor 4G. *J. Biol. Chem.*  
734 **289**, 21738–50
- 735 17. Olspert, A., Hosmillo, M., Chaudhry, Y., Peil, L., Truve, E., and Goodfellow, I.  
736 (2016) Protein-RNA linkage and posttranslational modifications of feline  
737 calicivirus and murine norovirus VPg proteins. *PeerJ.* **4**, e2134
- 738 18. Hyde, J. L., and Mackenzie, J. M. (2010) Subcellular localization of the MNV-  
739 1 ORF1 proteins and their potential roles in the formation of the MNV-1  
740 replication complex. *Virology.* **406**, 138–148
- 741 19. Nice, T. J., Strong, D. W., McCune, B. T., Pohl, C. S., and Virgin, H. W. (2013) A  
742 Single-Amino-Acid Change in Murine Norovirus NS1/2 Is Sufficient for  
743 Colonic Tropism and Persistence. *J. Virol.* **87**, 327–334
- 744 20. Pfister, T., and Wimmer, E. (2001) Polypeptide p41 of a Norwalk-Like  
745 Virus Is a Nucleic Acid-Independent Nucleoside Triphosphatase. *J. Virol.*  
746 **75**, 1611–1619
- 747 21. Cotton, B. T., Hyde, J. L., Sarvestani, S. T., Sosnovtsev, S. V, Green, K. Y.,  
748 White, P. A., and Mackenzie, J. M. (2017) The Norovirus NS3 Protein Is a  
749 Dynamic Lipid- and Microtubule-Associated Protein Involved in Viral RNA  
750 Replication. *J. Virol.* **91**, e02138–16
- 751 22. Rocha-Pereira, J., Van Dycke, J., and Neyts, J. (2016) Norovirus genetic  
752 diversity and evolution: implications for antiviral therapy. *Curr. Opin. Virol.*  
753 **20**, 92–98

- 754 23. Arias, A., Emmott, E., Vashist, S., and Goodfellow, I. (2013) Progress  
755 towards the prevention and treatment of norovirus infections. *Future*  
756 *Microbiol.* **8**, 1475–1487
- 757 24. Haga, K., Fujimoto, A., Takai-Todaka, R., Miki, M., Doan, Y. H., Murakami, K.,  
758 Yokoyama, M., Murata, K., Nakanishi, A., and Katayama, K. (2016)  
759 Functional receptor molecules CD300lf and CD300ld within the CD300  
760 family enable murine noroviruses to infect cells. *Proc. Natl. Acad. Sci. U. S.*  
761 *A.* **113**, E6248–E6255
- 762 25. Orchard, R. C., Wilen, C. B., Doench, J. G., Baldridge, M. T., McCune, B. T., Lee,  
763 Y.-C. J., Lee, S., Pruett-Miller, S. M., Nelson, C. A., Fremont, D. H., and Virgin,  
764 H. W. (2016) Discovery of a proteinaceous cellular receptor for a  
765 norovirus. *Science.* **353**, 933–6
- 766 26. Hyde, J. L., Sosnovtsev, S. V., Green, K. Y., Wobus, C., Virgin, H. W., and  
767 Mackenzie, J. M. (2009) Mouse Norovirus Replication Is Associated with  
768 Virus-Induced Vesicle Clusters Originating from Membranes Derived from  
769 the Secretory Pathway. *J. Virol.* **83**, 9709–9719
- 770 27. Holden, P., and Horton, W. A. (2009) Crude subcellular fractionation of  
771 cultured mammalian cell lines. *BMC Res. Notes.* **2**, 243
- 772 28. Schechter, I., and Berger, A. (1967) On the size of the active site in  
773 proteases. I. Papain. *Biochem. Biophys. Res. Commun.* **27**, 157–62
- 774 29. Barrios-Rodiles, M., Brown, K. R., Ozdamar, B., Bose, R., Liu, Z., Donovan, R.  
775 S., Shinjo, F., Liu, Y., Dembowy, J., Taylor, I. W., Luga, V., Przulj, N., Robinson,  
776 M., Suzuki, H., Hayashizaki, Y., Jurisica, I., and Wrana, J. L. (2005) High-  
777 Throughput Mapping of a Dynamic Signaling Network in Mammalian Cells.  
778 *Science.* **307**, 1621–1625



- 779 30. Barrios-Rodiles, M., Ellis, J. D., Blencowe, B. J., and Wrana, J. L. (2017)  
780 LUMIER: A Discovery Tool for Mammalian Protein Interaction Networks.  
781 in *Methods in molecular biology (Clifton, N.J.)*, pp. 137–148, **1550**, 137–148
- 782 31. Bailey, D., Kaiser, W. J., Hollinshead, M., Moffat, K., Chaudhry, Y., Wileman,  
783 T., Sosnovtsev, S. V., and Goodfellow, I. G. (2010) Feline calicivirus p32, p39  
784 and p30 proteins localize to the endoplasmic reticulum to initiate  
785 replication complex formation. *J. Gen. Virol.* **91**, 739–749
- 786 32. Subba-Reddy, C. V., Goodfellow, I., and Kao, C. C. (2011) VPg-Primed RNA  
787 Synthesis of Norovirus RNA-Dependent RNA Polymerases by Using a  
788 Novel Cell-Based Assay. *J. Virol.* **85**, 13027–13037
- 789 33. May, J., Korba, B., Medvedev, A., and Viswanathan, P. (2013) Enzyme  
790 kinetics of the human norovirus protease control virus polyprotein  
791 processing order. *Virology.* **444**, 218–24
- 792 34. Medvedev, A., Viswanathan, P., May, J., and Korba, B. (2017) Regulation of  
793 human norovirus VPg nucleotidylation by ProPol and nucleoside  
794 triphosphate binding by its amino terminal sequence in vitro. *Virology.*  
795 **503**, 37–45
- 796 35. Reid, C., Airo, A., and Hobman, T. (2015) The Virus-Host Interplay:  
797 Biogenesis of +RNA Replication Complexes. *Viruses.* **7**, 4385–4413
- 798 36. den Boon, J. A., Diaz, A., Ahlquist, P., Nibert, M. L., Baker, T. S., Walther, P.,  
799 Fuller, S. D., Antony, C., Krijnse-Locker, J., Bartenschlager, R., and al., et  
800 (2010) Cytoplasmic viral replication complexes. *Cell Host Microbe.* **8**, 77–  
801 85
- 802 37. Kaiser, W. J., Chaudhry, Y., Sosnovtsev, S. V., and Goodfellow, I. G. (2006)  
803 Analysis of protein-protein interactions in the feline calicivirus replication

- 804 complex. *J. Gen. Virol.* **87**, 363–368
- 805 38. Vashist, S., Urena, L., and Goodfellow, I. (2012) Development of a strand  
806 specific real-time RT-qPCR assay for the detection and quantitation of  
807 murine norovirus RNA. *J. Virol. Methods.* **184**, 69–76
- 808 39. Rohayem, J., Robel, I., Jager, K., Scheffler, U., and Rudolph, W. (2006)  
809 Protein-Primed and De Novo Initiation of RNA Synthesis by Norovirus  
810 3Dpol. *J. Virol.* **80**, 7060–7069
- 811 40. Subba-Reddy, C. V, Yunus, M. A., Goodfellow, I. G., and Kao, C. C. (2012)  
812 Norovirus RNA synthesis is modulated by an interaction between the viral  
813 RNA-dependent RNA polymerase and the major capsid protein, VP1. *J.*  
814 *Virol.* **86**, 10138–49
- 815 41. Oh, H. S., Pathak, H. B., Goodfellow, I. G., Arnold, J. J., and Cameron, C. E.  
816 (2009) Insight into Poliovirus Genome Replication and Encapsidation  
817 Obtained from Studies of 3B-3C Cleavage Site Mutants. *J. Virol.* **83**, 9370–  
818 9387
- 819 42. Leen, E. N., Sorgeloos, F., Correia, S., Chaudhry, Y., Cannac, F., Pastore, C.,  
820 Xu, Y., Graham, S. C., Matthews, S. J., Goodfellow, I. G., and Curry, S. (2016) A  
821 Conserved Interaction between a C-Terminal Motif in Norovirus VPg and  
822 the HEAT-1 Domain of eIF4G Is Essential for Translation Initiation. *PLoS*  
823 *Pathog.* **12**, e1005379
- 824 43. Chaudhry, Y., Skinner, M. A., and Goodfellow, I. G. (2007) Recovery of  
825 genetically defined murine norovirus in tissue culture by using a fowlpox  
826 virus expressing T7 RNA polymerase. *J. Gen. Virol.* **88**, 2091–100
- 827 44. Hwang, S., Alhatlani, B., Arias, A., Caddy, S. L., Christodoulou, C., Cunha, J. B.,  
828 Emmott, E., Gonzalez-Hernandez, M., Kolawole, A., Lu, J., Rippinger, C.,

- 829           Sorgeloos, F., Thorne, L., Vashist, S., Goodfellow, I., and Wobus, C. E. (2014)  
830           Murine norovirus: propagation, quantification, and genetic manipulation.  
831           *Curr. Protoc. Microbiol.* **33**, 15K.2.1–15K.2.61
- 832   45.   Arias, A., Ureña, L., Thorne, L., Yunus, M. A., and Goodfellow, I. (2012)  
833           Reverse genetics mediated recovery of infectious murine norovirus. *J. Vis.*  
834           *Exp.* 10.3791/4145
- 835   46.   Viswanathan, P., May, J., Uhm, S., Yon, C., and Korba, B. (2013) RNA binding  
836           by human Norovirus 3C-like proteases inhibits protease activity. *Virology.*  
837           **438**, 20–7
- 838   47.   Vashist, S., Urena, L., Chaudhry, Y., and Goodfellow, I. (2012) Identification  
839           of RNA-protein interaction networks involved in the norovirus life cycle. *J.*  
840           *Virol.* **86**, 11977–90
- 841   48.   Malo, N., Hanley, J. A., Cerquozzi, S., Pelletier, J., and Nadon, R. (2006)  
842           Statistical practice in high-throughput screening data analysis. *Nat.*  
843           *Biotechnol.* **24**, 167–175
- 844  
845  
846

847 **Figure legends:**

848 **Figure 1. Norovirus protease produced during authentic viral replication**

849 **inefficiently cleaves a cytoplasmic-localized protease substrate.** A) Genome

850 schematic of the murine norovirus genome highlighting the major open reading

851 frames and the components of the polyprotein. B) Schematic of the CFP-YFP

852 FRET sensor highlighting the NS1/2-NS3 boundary cleavage site. C) Western blot

853 analysis of HEK-293T cells co-transfected with the FRET sensor and either wild-

854 type or catalytically inactive protease (WT and H30A respectively), or BV-2 cells

855 electroporated with *in vitro* transcribed RNA encoding the FRET sensor and

856 subsequently infected at MOI 10 TCID<sub>50</sub>/cell with MNV for 9h. Higher molecular

857 weight NS6 containing isoforms produced during viral infection are indicated

858 with asterisks. Note that the left and right-hand regions of the NS6 western blot

859 were imaged at different intensities to compensate for the lower NS6 signal

860 intensity in infected cells. D) Confocal microscopy of HeLa-CD300lf cells

861 transfected with the FRET sensor and either co-transfected with an NS6

862 expression construct (NS6) and harvested at 18h post-transfection, or infected

863 with MNV (+MNV) at a MOI of 10 TCID<sub>50</sub>/cell at 6h post-transfection, and

864 harvested at 12h post-infection. The FRET sensor was visualized in the CFP and

865 YFP channels, the protease with antisera against NS6, and nuclei stained with

866 DAPI.

867

868 **Figure 2. Targeting protease substrates to the norovirus replication**

869 **complex enhances cleavage by NS6.** A) Western blotting of cells BSR-T7 cells

870 transfected with either proteolytically active (MNV-FLC) or inactive (MNV-

871 H30A) full-length infectious MNV clone, or polyprotein fused to the FRET sensor

872 (ORF1-FRET-WT, ORF1-FRET-H30A). Samples were lysed at 18h post-  
873 transfection. B) Confocal microscopy of BSR-T7 cells fixed at 18h post-  
874 transfection with ORF1-FRET-WT or ORF1-FRET-H30A constructs. The FRET  
875 substrate was visualized in the CFP and YFP channels, and nuclei stained with  
876 DAPI.

877

878 **Figure 3. Accumulation of polyprotein precursors during MNV infection.**

879 BV-2 cells were infected at a MOI of 10 TCID<sub>50</sub>/cell, and harvested at the  
880 indicated times post-infection. Western blot analysis with antisera against A)  
881 NS6 or B) NS5/VPg revealed the high levels of precursor proteins present at  
882 early stages of infection. To ensure efficient transfer and resolution of the  
883 various precursors, samples were separated on both 7.5% (upper) and 17.5%  
884 (lower) SDS-PAGE gels prior to transfer and western blot. C) Infectious virus  
885 produced across the timecourse was determined by TCID<sub>50</sub> following freeze-  
886 thaw to release intracellular virus. D) To investigate precursor localization, BV-2  
887 cells were infected at MOI 10 and harvested at 9h post-infection where they  
888 were subject to fractionation into soluble cytoplasmic, and cytoplasmic  
889 membrane-associated fractions. Lysates were blotted for viral and cellular  
890 markers as indicated.

891

892 **Figure 4. Activity of NS6-containing stable precursors.** FLAG-tagged forms of

893 the various protease-containing precursors were generated by mutagenesis of  
894 the P1 residue at each cleavage site to an alanine. A H30A mutation within the  
895 protease abolished proteolytic activity. A) A schematic illustrating the 10  
896 possible NS6-containing precursors generated by NS6 cleavage of the

897 polyprotein. Protease-containing precursors may all be observed following B) *in*  
898 *vitro* translation of the precursors incorporating <sup>35</sup>S Met labeling followed by  
899 phosphorimaging, or C) Expression in BSR-T7 cells visualized by western  
900 blotting. Incubation of unlabeled *in vitro* translated precursors with <sup>35</sup>S  
901 Methionine-labeled substrate demonstrates cleavage of the D) cellular substrate  
902 PABP. E) Western blotting of BSR-T7 cells harvested at 18h post-transfection  
903 with the precursors and FLAG-PABP reveals only a subset of precursors cleave  
904 PABP in cells. FLAG-tagged precursors are also visible on this image and are  
905 indicated with an asterisk (\*). F) Western blotting of BSR-T7 cells co-expressing  
906 ORF1-FRET-H30A as substrate for trans-cleavage by co-expressed protease  
907 precursors shows cleavage of this substrate by all precursors at 18h post-  
908 transfection.

909

910 **Figure 5. Confocal microscopy of protease precursors in mock or MNV-**  
911 **infected cells.** HeLa-CD300lf cells were transfected with the various protease  
912 precursor constructs and at 6h post-transfection, mock- or infected with MNV at  
913 MOI 10. The cells were fixed and processed for microscopy at 12h post-infection.  
914 Nuclei were visualized with DAPI, the precursors with anti-FLAG antisera, and  
915 infected cells with anti-dsRNA antisera.

916

917 **Figure 6. Components of the norovirus replication complex exhibit homo-**  
918 **and heteromeric interactions.** HEK-293T cells expressing Protein-A and  
919 Renilla luciferase fusions of the various MNV proteins were used for LUMIER  
920 analysis to identify protein:protein interactions. The numbers are robust z-  
921 scores. Positive protein:protein interactions are coloured by the strength of

922 interaction with weak interactions showing in pale yellow, with the strongest  
923 interactions in purple. Protein expression was confirmed by western blotting  
924 (Figure S4).

925

926 **Figure 7. Mutagenesis of polyprotein-FRET fusions reveals the importance**  
927 **of individual polyprotein components for replication complex targeting**  
928 **and substrate cleavage.** A) Schematic illustrating the various N-, C- and internal  
929 deletion mutants generated from ORF1-FRET-H30A. These mutants were  
930 transfected into BSR-T7 cells to function as trans-cleavage substrates. WT or  
931 proteolytically-inactive full length clone (MNV-FLC, MNV-H30A) was provided *in*  
932 *trans* to determine cleavage efficiency. Samples were harvested at 18h post-  
933 transfection. B) N-terminal, C) C-terminal and D) Internal deletions are shown.  
934 Substrate cleavage was assessed using anti-GFP antisera. ORF1-FRET-WT was  
935 used as a positive control (+). For clarity the position of either the full length  
936 (Mock cells) or fully-processed cleavage product (MNV infected cells) is  
937 highlighted with a red asterisk (\*).

938

939 **Figure 8. Substrate targeting to the replication complex permits NS6**  
940 **cleavage in infection.** *In vitro* transcribed RNA encoding select truncation  
941 mutants of ORF1-FRET-H30A was electroporated into BV-2 cells. At 6h post-  
942 electroporation these cells were infected at MOI 10 and lysates prepared at A) 9h  
943 or B) 12h post-infection. Trans-cleavage of the substrate was determined by  
944 anti-GFP staining, and the presence of active protease provided *in trans* by anti-  
945 NS7 staining. For clarity the position of either the full length (Mock cells) or fully-

946 processed cleavage product (MNV infected cells) is highlighted with a red  
947 asterisk (\*).

948

949 **Figure S1. Confirmation of precursor identity in MNV-infected cell lysates.**

950 Lysates from BV-2 cells mock- or infected with MNV at MOI 10 and harvested at  
951 9h post-infection, were compared to HEK-293T cell lysates mock- or transfected  
952 with plasmids expressing stable forms of the various precursors. Precursors  
953 were visualized by anti-NS6 and anti-NS5 antisera to assess co-migration. Note  
954 that the addition of a FLAG-tag on the precursors adds at additional 1.14kDa  
955 which results in some discrepancy in the migration of the smaller precursors.

956

957 **Figure S2. Confocal microscopy of N-terminal norovirus protease**

958 **precursors.** HeLa-CD300lf cells were transfected with plasmids expressing NS3-  
959 6, NS3-7, NS1/2-6 and NS1/2-7. At 18h post-transfection the cells were  
960 harvested and precursors visualized by anti-NS6 staining. Nuclei were visualized  
961 with DAPI.

962

963 **Figure S3. Western blotting of MNV LUMIER assay reagents confirms**

964 **expression.** Western blotting of lysates prepared from HEK-293T cells  
965 transfected with A) Renilla-luciferase or B) Protein-A fusions of the various MNV  
966 proteins confirms their expression and migration at the expected size. Samples  
967 were harvested at 24h post-transfection.

968

969 **Figure S4. LUMIER assay reveals GI.1 replication complex interactions are**

970 **conserved between GI.1 and MNV.** A) HEK-293T cells expressing Protein-A and



971 Renilla luciferase fusions of the various GI.1 human norovirus proteins were  
972 used for LUMIER analysis to identify protein:protein interactions. The numbers  
973 are robust z-scores. Positive protein:protein interactions are coloured by the  
974 strength of interaction with weak interactions showing in pale yellow, with the  
975 strongest interactions in purple. Western blotting of lysates prepared from HEK-  
976 293T cells transfected with B) Renilla-luciferase or C) Protein-A fusions of the  
977 various GI.1 norovirus proteins confirms their expression and migration at the  
978 expected size. Samples were harvested at 24h post-transfection.

979

980 **Figure S5. LUMIER assay reveals GII.4 replication complex interactions are**  
981 **conserved between GII.4 and MNV.** A) HEK-293T cells expressing Protein-A  
982 and Renilla luciferase fusions of the various GII.4 human norovirus proteins were  
983 used for LUMIER analysis to identify protein:protein interactions. The numbers  
984 are robust z-scores. Positive protein:protein interactions are coloured by the  
985 strength of interaction with weak interactions showing in pale yellow, with the  
986 strongest interactions in purple. Western blotting of lysates prepared from HEK-  
987 293T cells transfected with B) Renilla-luciferase or C) Protein-A fusions of the  
988 various GII.4 norovirus proteins confirms their expression and migration at the  
989 expected size. Samples were harvested at 24h post-transfection.

990

991 **Table S1. Predicted molecular weights of norovirus proteins and precursor**  
992 **forms.** The first tab lists all the potential norovirus proteins and precursors that  
993 can be derived from the polyprotein. The second and third tabs list all the NS5-  
994 or NS6-containing precursors ranked by molecular weight from largest to

995 smallest. Predicted molecular weight was calculated using the ExPASy server

996 ProtParam tool.

997

998 **Supplemental Information:**

999 This manuscript has five supplementary figures and one supplementary table.

1000

## Fig 1.

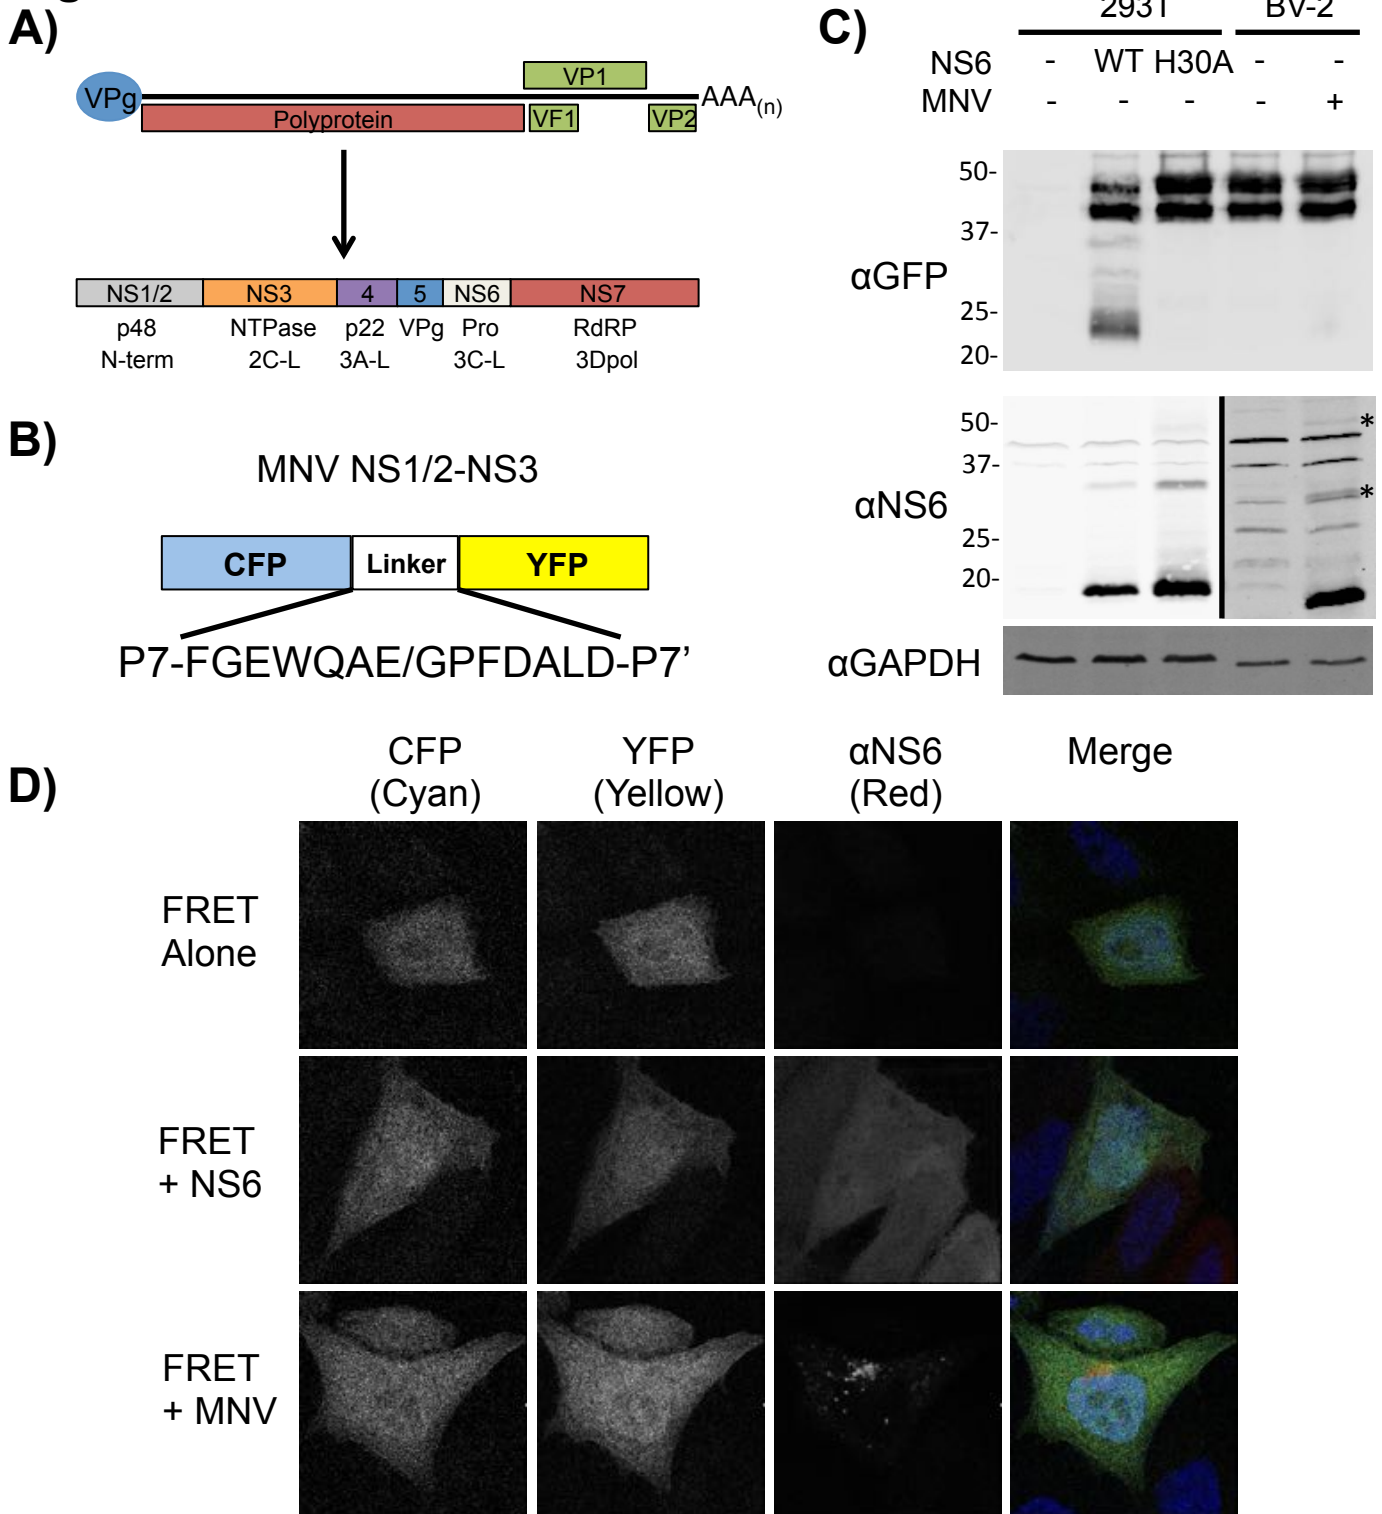

## Fig 2.

**A)**

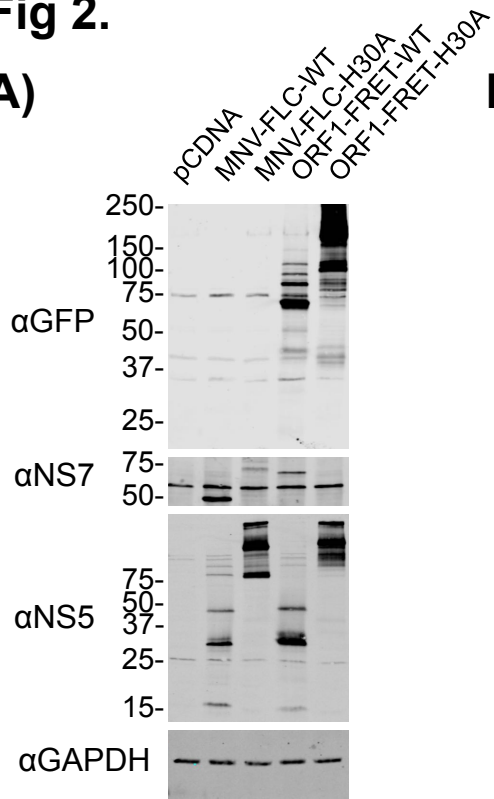

**B)**

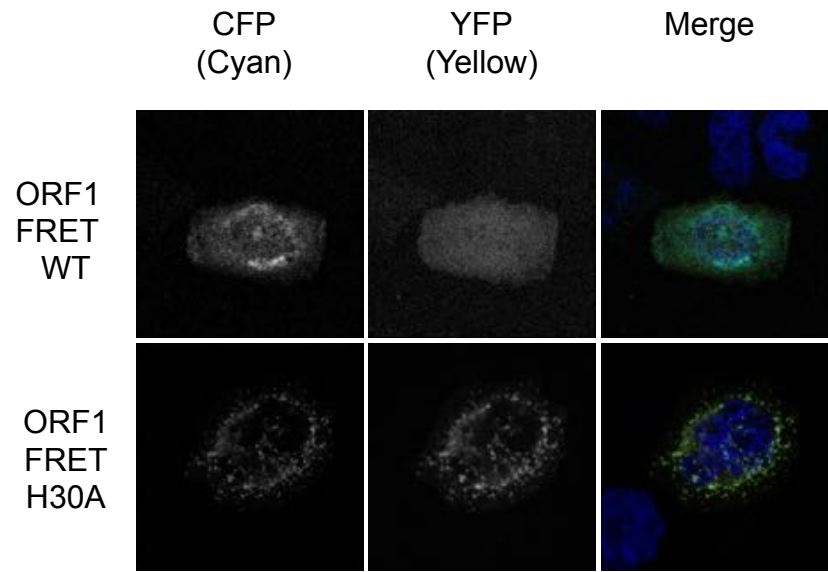

### Fig 3.

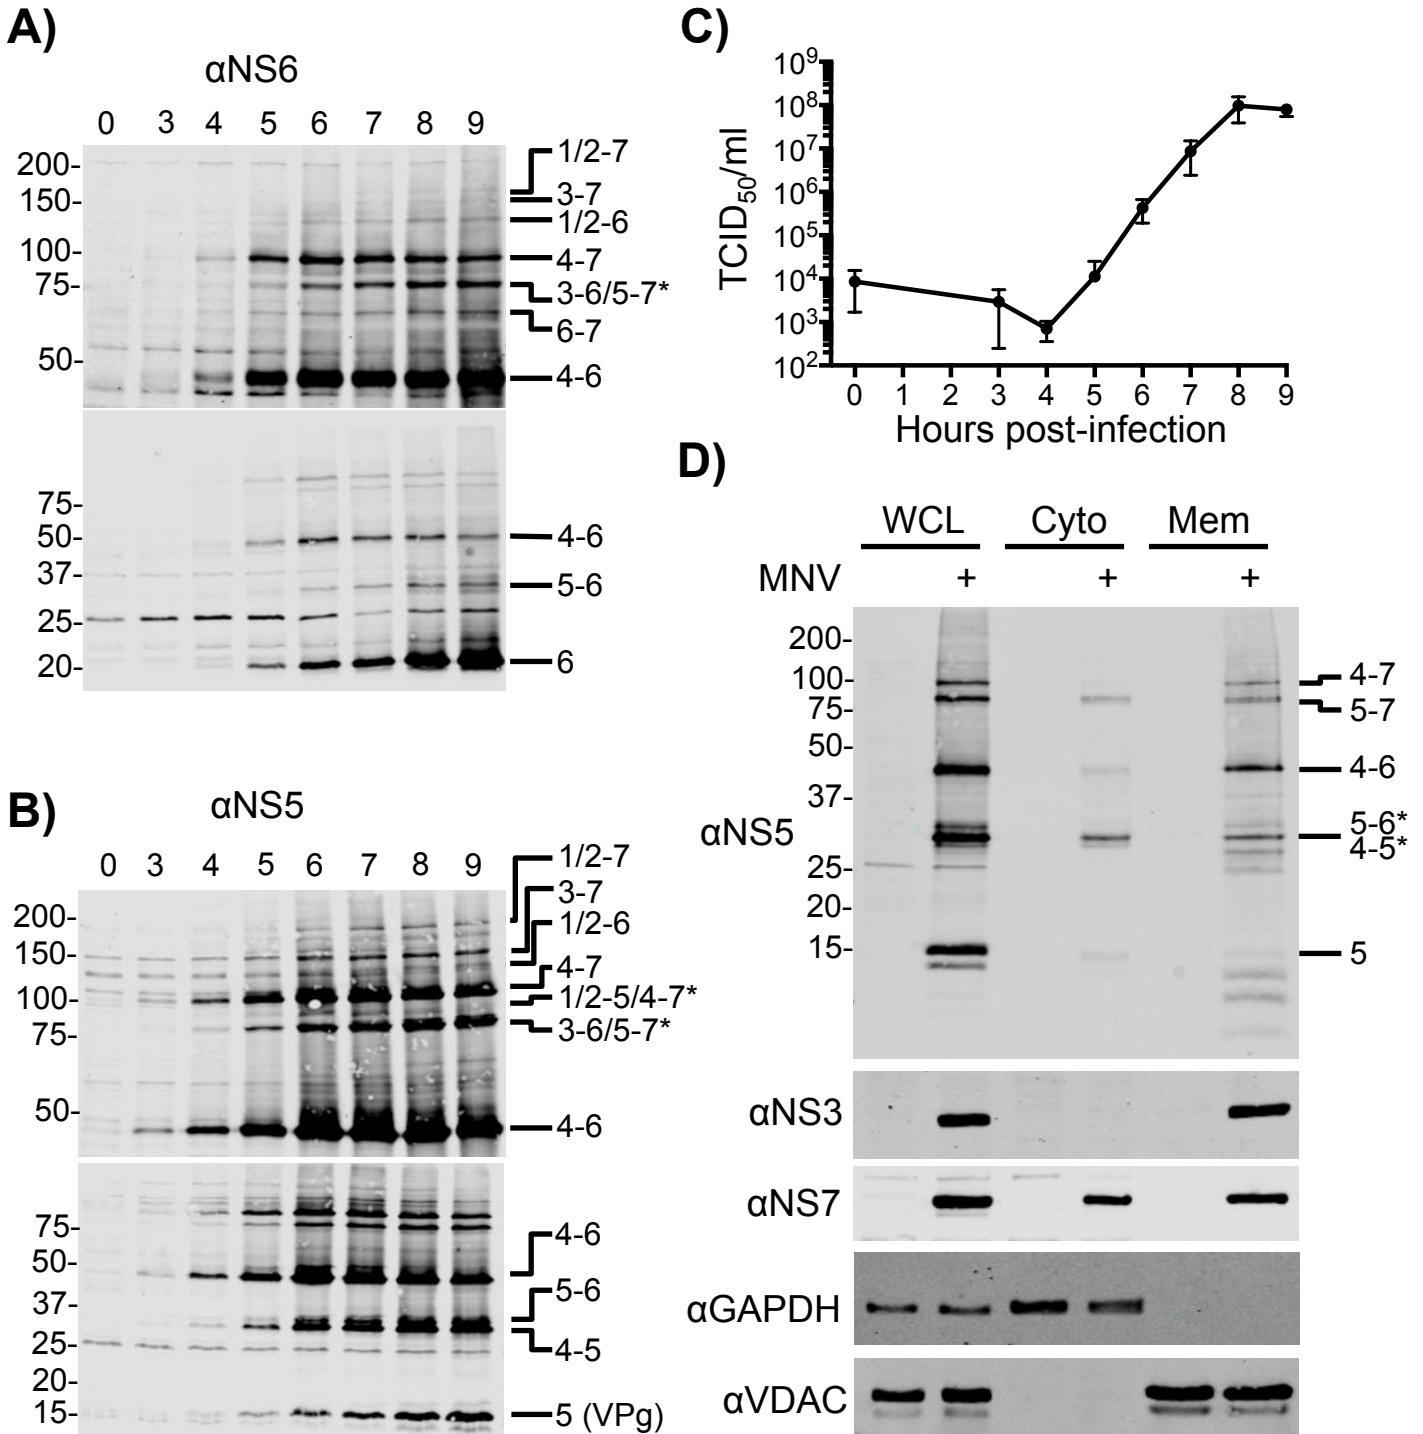

## Fig 4.

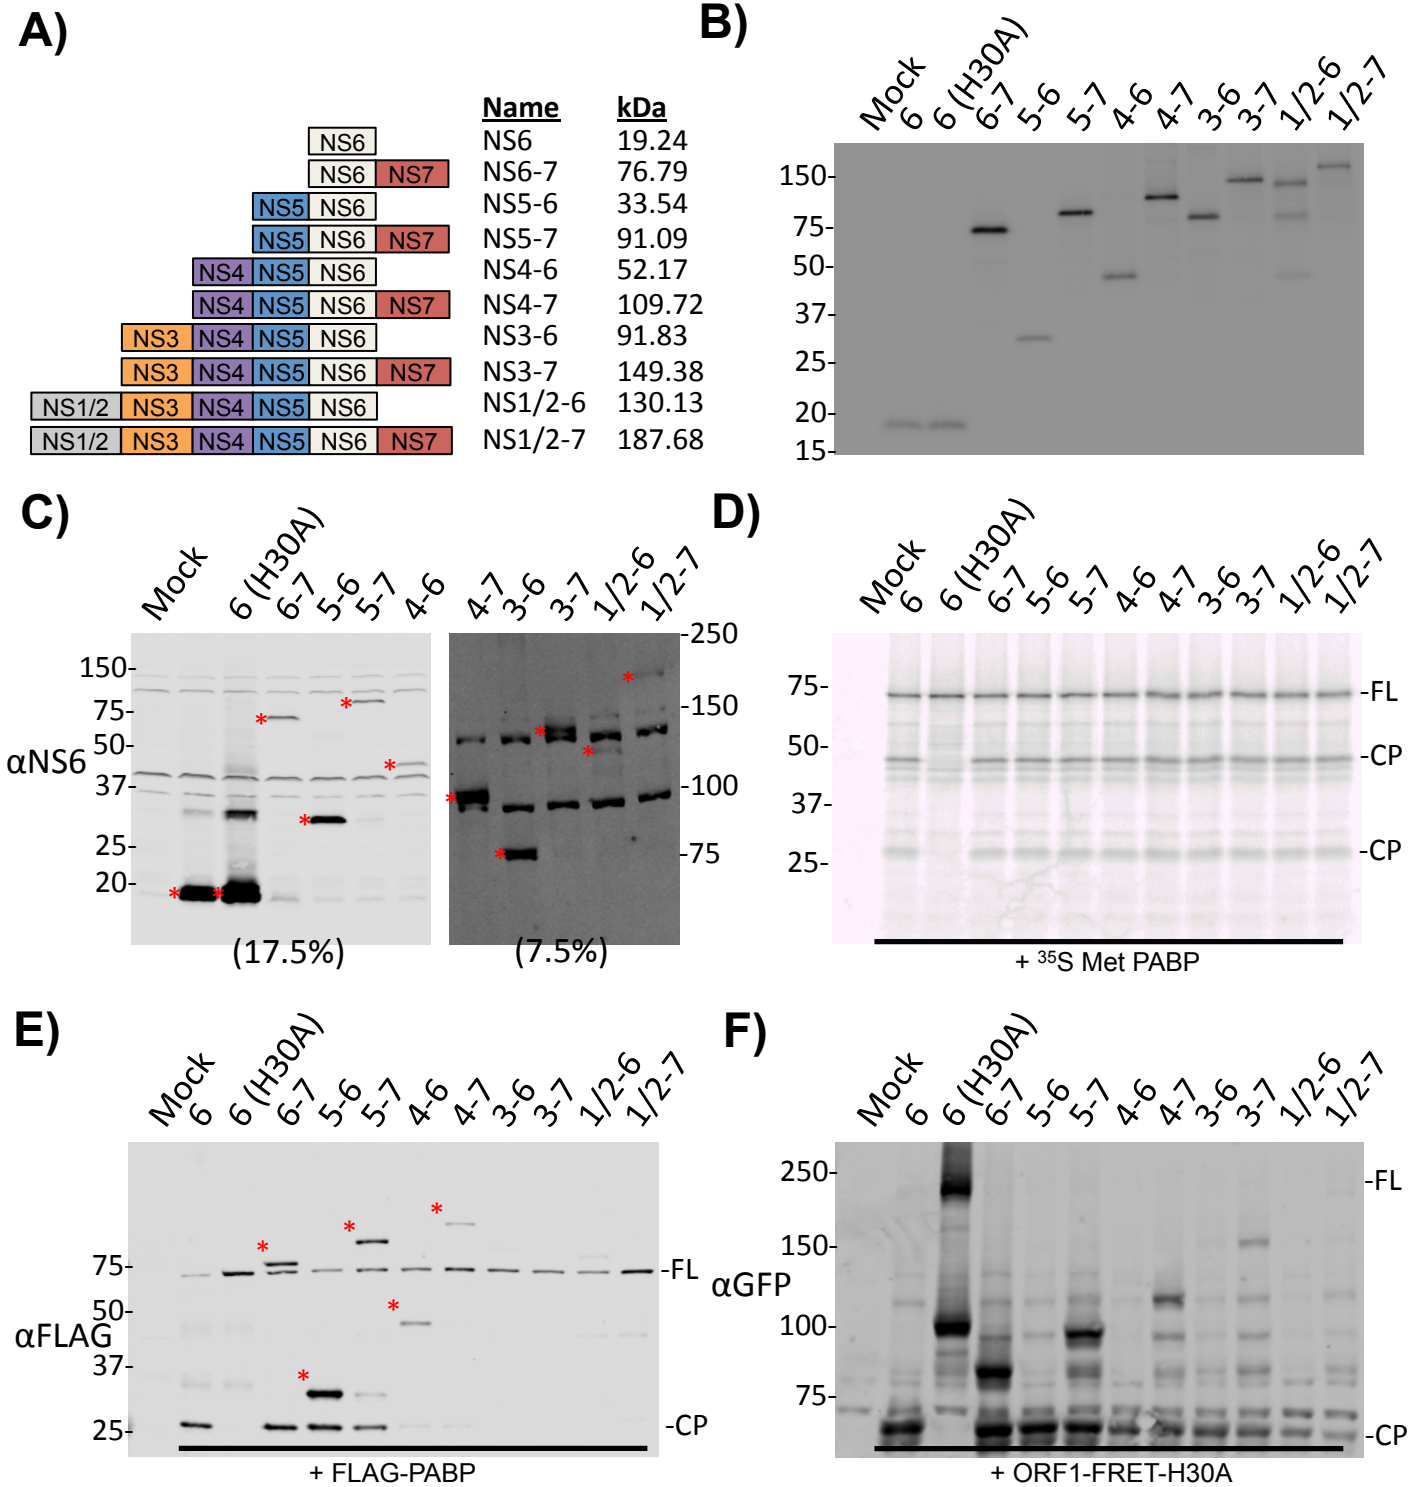

**Fig 5.**

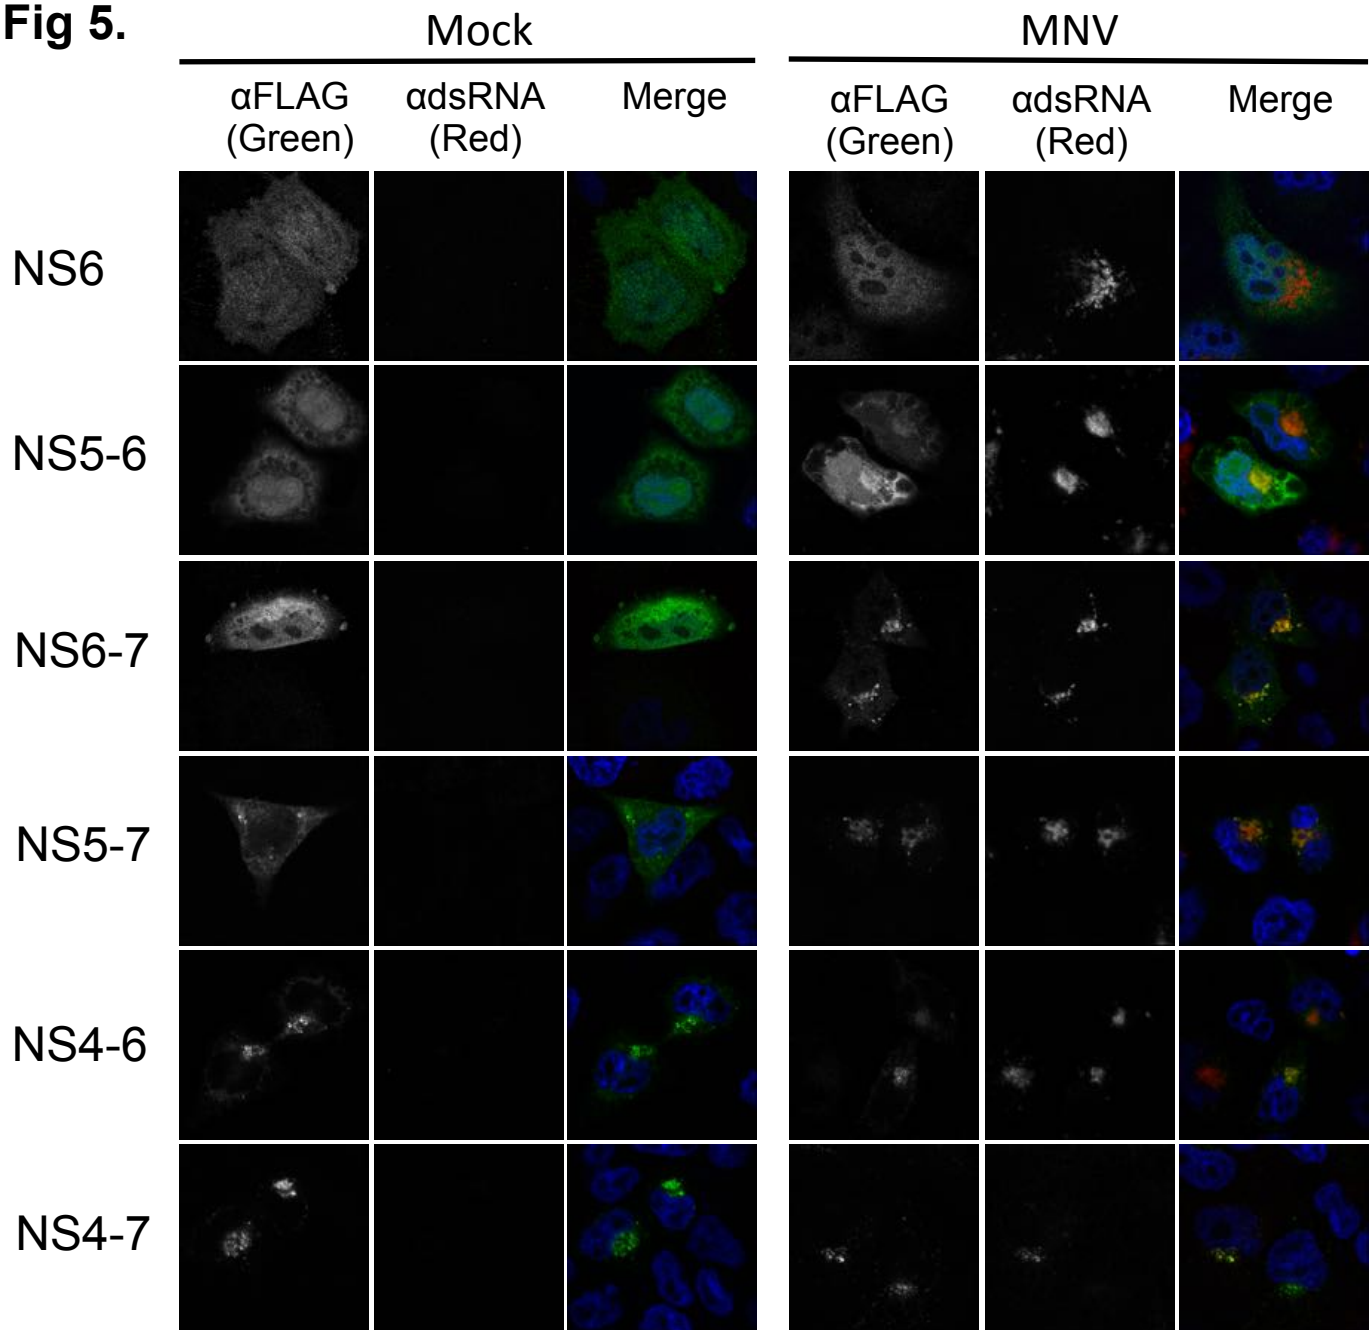

**Fig 6.**

| MNV<br>GV.1                        |       | Protein A fusion proteins |      |      |      |      |      |      |      |      |
|------------------------------------|-------|---------------------------|------|------|------|------|------|------|------|------|
|                                    |       | NS1/2                     | NS3  | NS4  | NS5  | NS6  | NS7  | VP1  | VP2  | VF1  |
| Renilla luciferase fusion proteins | NS1/2 | 55.3                      | 4.5  | 51.0 | 1.8  | 1.8  | 10.2 | 1.6  | 1.3  | 0.5  |
|                                    | NS3   | 3.6                       | 4.4  | 2.3  | -0.3 | 1.3  | -0.3 | -0.4 | 0.3  | 0.2  |
|                                    | NS4   | 16.2                      | -0.1 | 10.1 | 1.8  | 1.7  | 1.4  | 0.1  | 1.6  | 1.3  |
|                                    | NS5   | -0.2                      | -0.2 | -0.4 | -1.4 | -0.7 | 6.3  | -1.4 | -1.4 | 0.3  |
|                                    | NS6   | 0.8                       | 2.6  | 0.3  | -0.2 | -0.4 | 0.6  | 0.7  | 0.2  | 0.0  |
|                                    | NS7   | 5.8                       | 2.7  | 1.6  | 3.1  | -2.4 | 12.4 | 19.8 | 5.3  | -1.4 |
|                                    | VP1   | -0.5                      | -1.5 | 0.8  | -0.2 | 1.8  | 6.2  | 18.3 | 10.9 | -0.4 |
|                                    | VP2   | -0.8                      | -1.7 | -0.4 | 1.0  | -0.9 | 0.8  | 9.7  | 12.4 | -0.4 |
| VF1                                | 2.5   | 1.1                       | 1.9  | 0.4  | 0.3  | 0.3  | 1.3  | 0.1  | 0.5  |      |

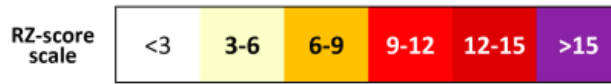



**Fig 7.**  
**A)**

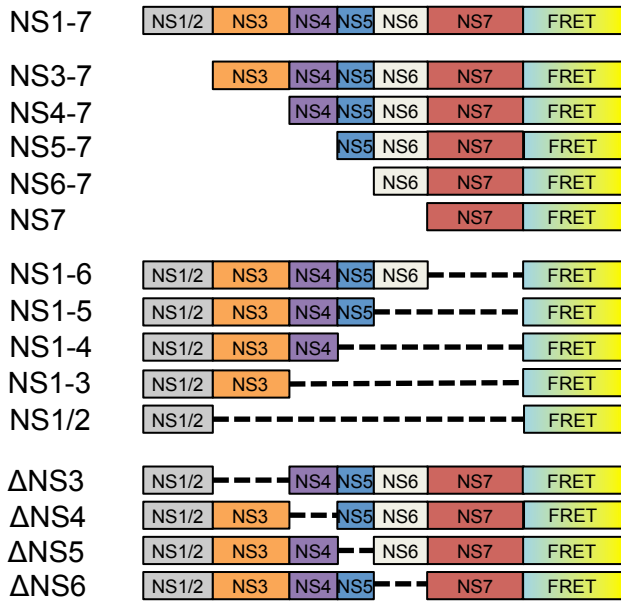

**B)**

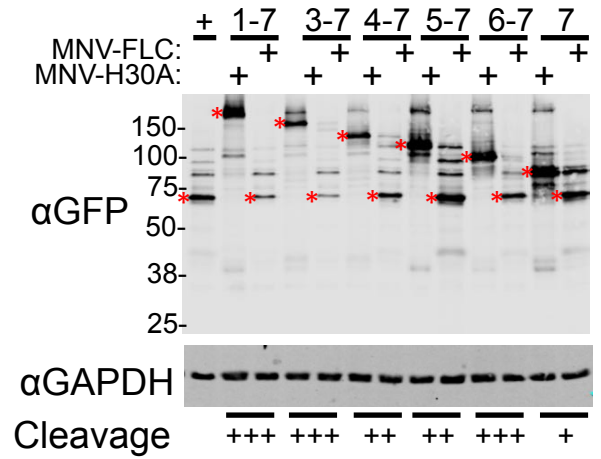

**C)**

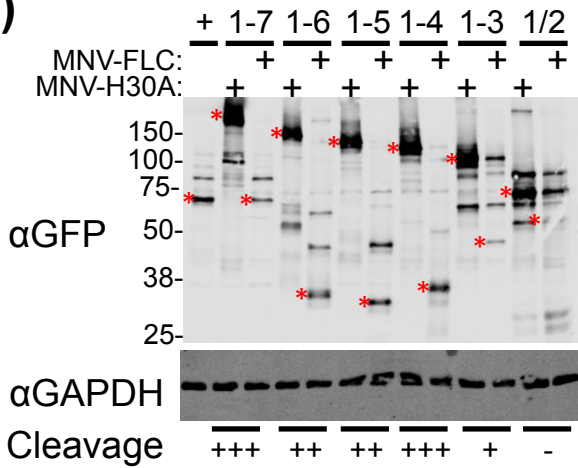

**D)**

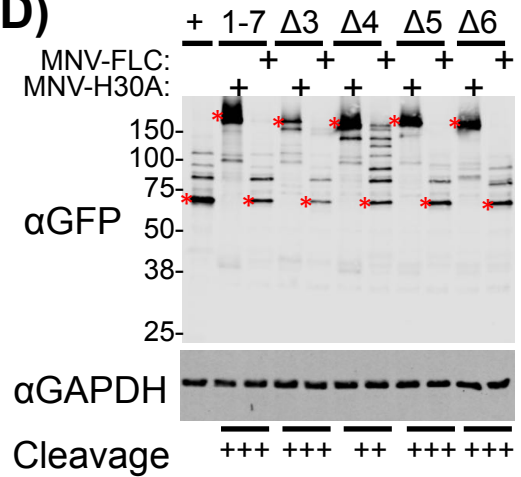

**Fig 8.**

**A)**

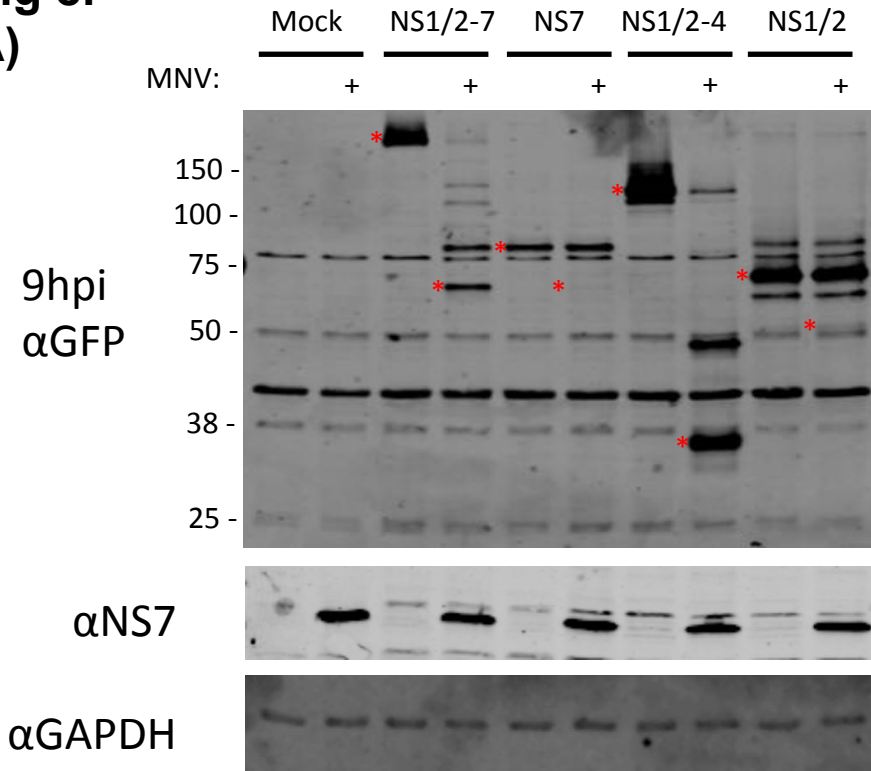

**B)**

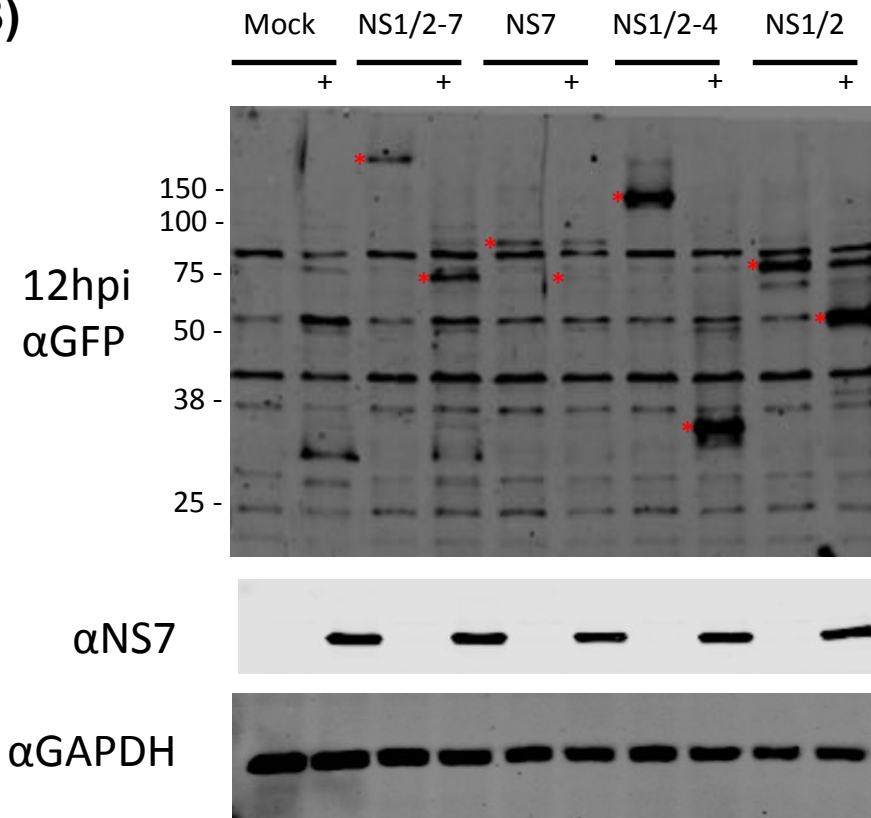

**Fig S1.**

**A) NS6**

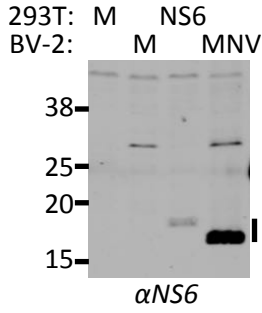

**B) H30A**

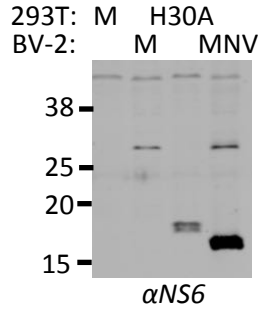

**C) NS6-7**

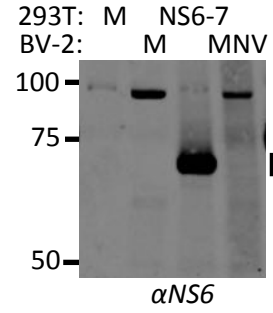

**D) NS5-6**

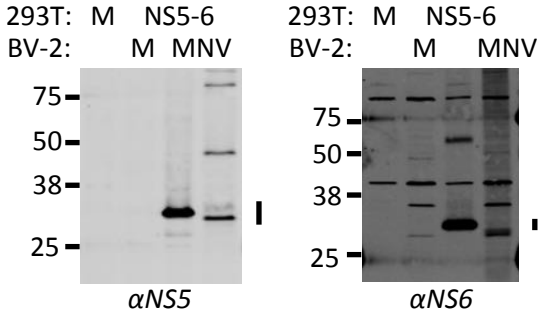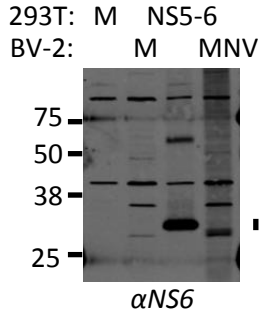

**E) NS5-7**

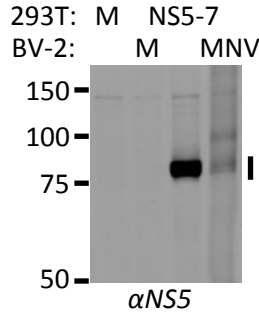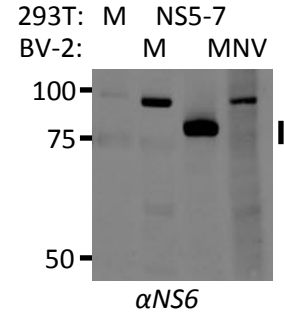

**F) NS4-6**

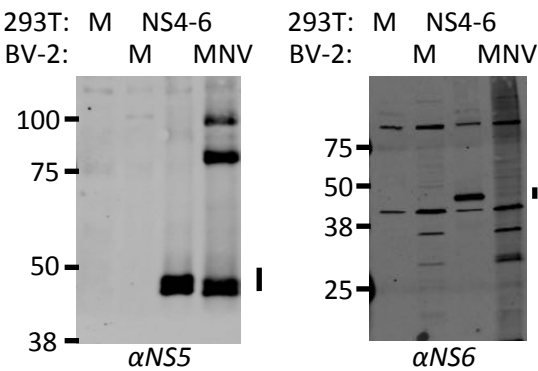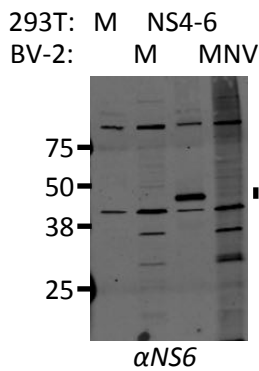

**G) NS4-7**

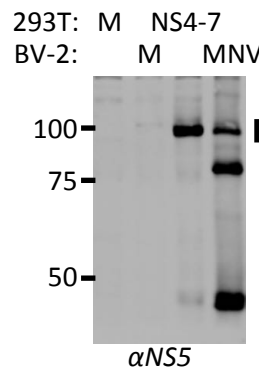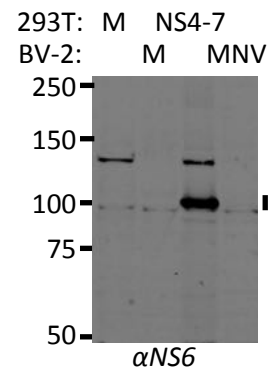

**H) NS3-6**

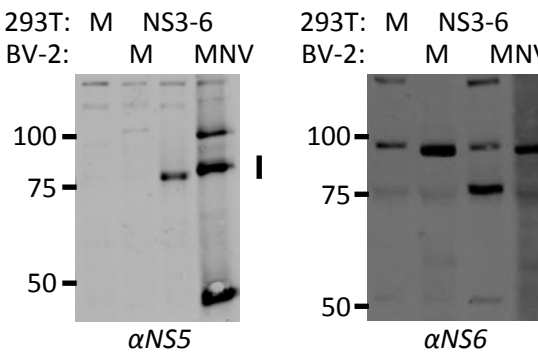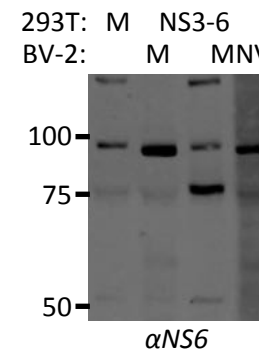

**I) NS3-7**

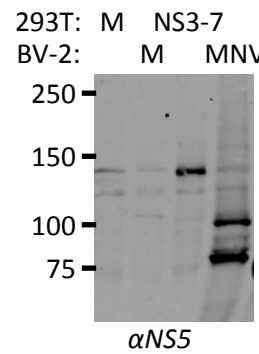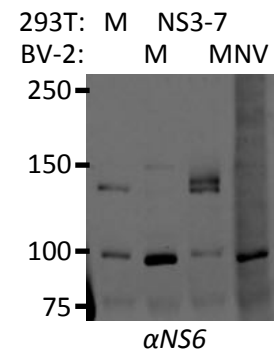

**J) NS1/2-6**

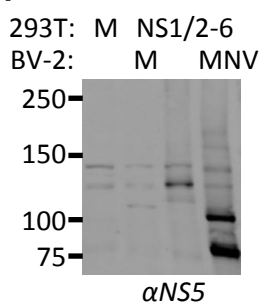

**K) NS1/2-7**

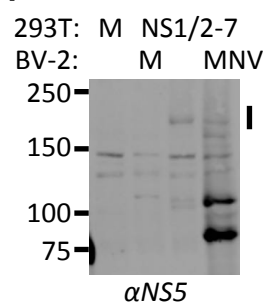

**Fig S2.**

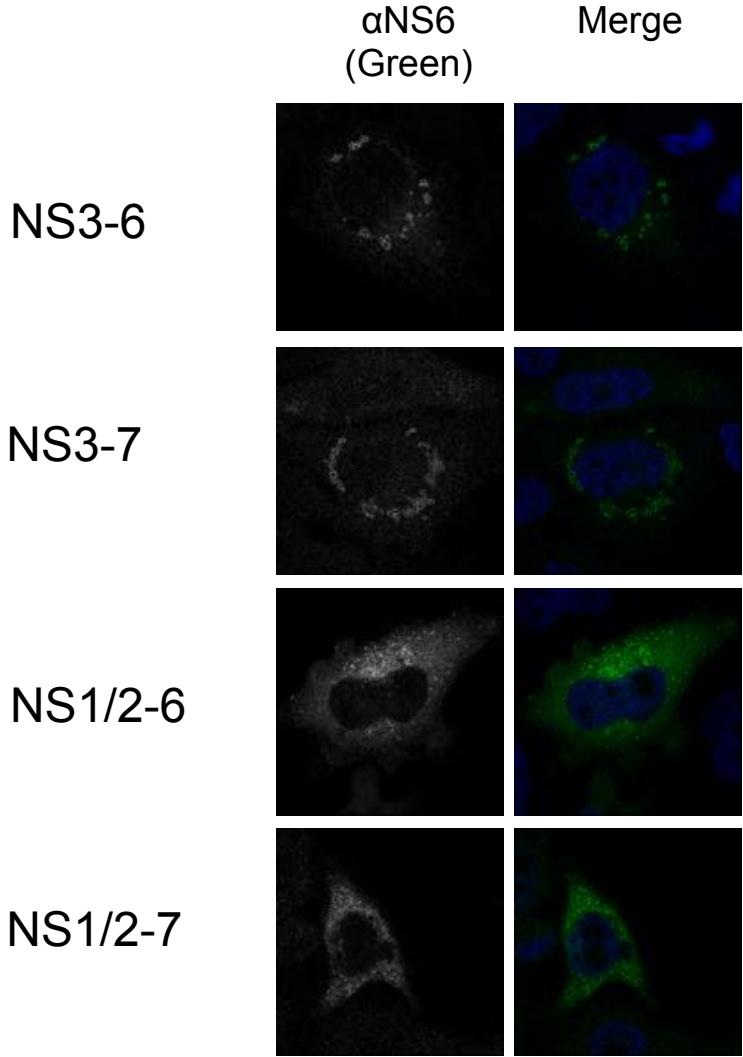

**Fig S3.**

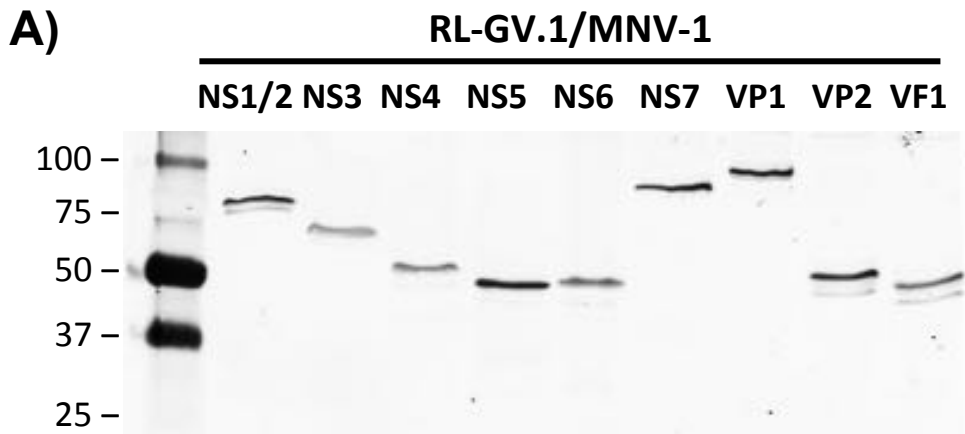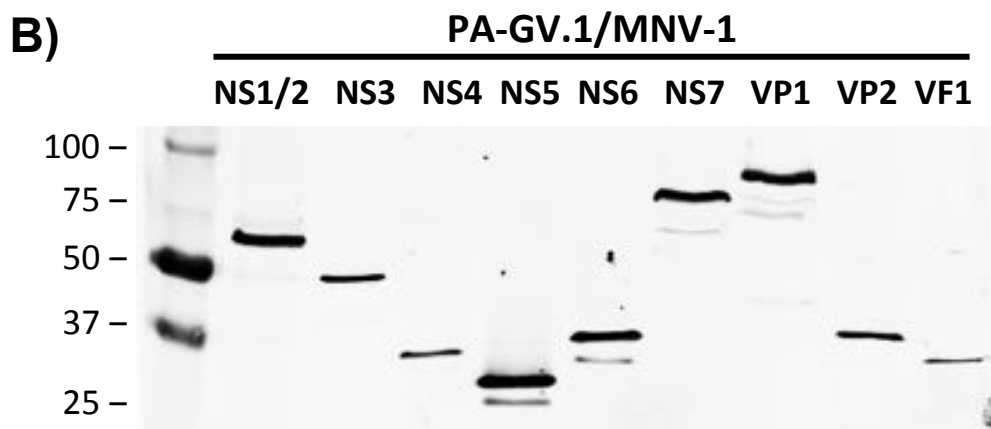

**Fig S4.**

**A)**

| NV<br>GI.1                         | Protein A fusion proteins |      |      |      |      |      |      |      |      |
|------------------------------------|---------------------------|------|------|------|------|------|------|------|------|
|                                    | NS1/2                     | NS3  | NS4  | NS5  | NS6  | NS7  | VP1  | VP2  |      |
| Renilla luciferase fusion proteins | NS1/2                     | 29.5 | -0.9 | 21.5 | 0.6  | 1.7  | 4.1  | 0.3  | -2.0 |
|                                    | NS3                       | 1.5  | 1.6  | 1.9  | -0.4 | 0.3  | 0.1  | -0.7 | -0.7 |
|                                    | NS4                       | 37.7 | -0.4 | 5.5  | 0.1  | -3.2 | -0.8 | 2.1  | -2.5 |
|                                    | NS5                       | -1.6 | 0.2  | -0.6 | 1.3  | 1.6  | 11.5 | 0.6  | -1.0 |
|                                    | NS6                       | 1.3  | -2.4 | -1.7 | -2.1 | -2.0 | -2.3 | 0.0  | -2.3 |
|                                    | NS7                       | 4.7  | -1.3 | -1.2 | 4.3  | 0.4  | 6.5  | 6.5  | 2.0  |
|                                    | VP1                       | 3.9  | -0.1 | 2.0  | 1.5  | -0.1 | 4.7  | 32.4 | 4.6  |
|                                    | VP2                       | 1.6  | -0.7 | -0.5 | 1.7  | 2.8  | 1.8  | 17.9 | 13.8 |

RZ-score scale: <3 (white), 3-6 (light yellow), 6-9 (yellow), 9-12 (orange), 12-15 (red), >15 (purple)

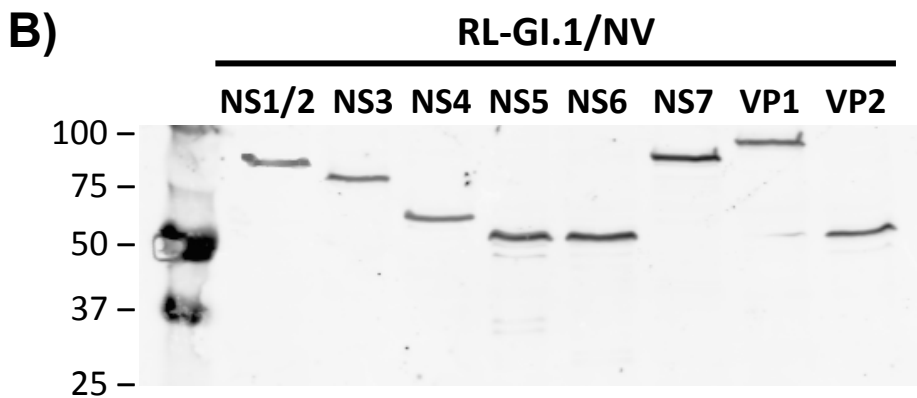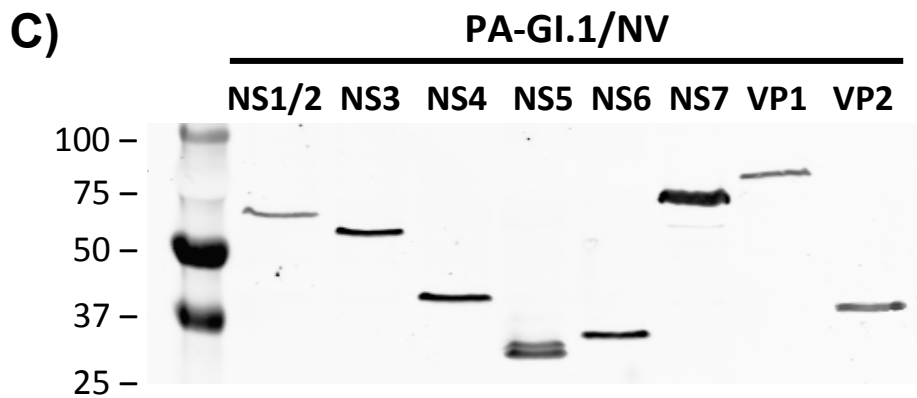

**Fig S5.**

**A)**

| MD<br>GII.4                        | Protein A fusion proteins |      |      |      |      |      |      | VP1  | VP2  |
|------------------------------------|---------------------------|------|------|------|------|------|------|------|------|
|                                    | NS1/2                     | NS3  | NS4  | NS5  | NS6  | NS7  |      |      |      |
| Renilla luciferase fusion proteins | NS1/2                     | 27.3 | 1.6  | 27.8 | 0.8  | 1.2  | 3.2  | 1.4  | 1.5  |
|                                    | NS3                       | 1.1  | 1.0  | -0.3 | 0.7  | -0.1 | 0.3  | 0.0  | 0.0  |
|                                    | NS4                       | 24.9 | -0.6 | 3.5  | 1.6  | 0.6  | 0.4  | 1.5  | 1.1  |
|                                    | NS5                       | 2.3  | -0.3 | -2.7 | -0.6 | -0.7 | 7.7  | 0.7  | 1.5  |
|                                    | NS6                       | 1.5  | -1.2 | -0.6 | -0.6 | 0.8  | -0.5 | -0.9 | -0.2 |
|                                    | NS7                       | 8.9  | 1.6  | 2.2  | 3.2  | 0.8  | 7.1  | 13.3 | -1.8 |
|                                    | VP1                       | 5.9  | -0.1 | -0.7 | 2.3  | 0.6  | 5.4  | 8.6  | 13.9 |
| VP2                                | 2.0                       | 1.3  | -1.4 | 1.2  | 1.0  | 0.9  | 10.0 | 10.3 |      |

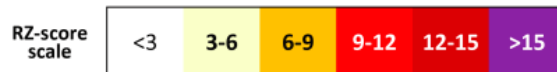

**B)**

**RL-GII.4/MD145**

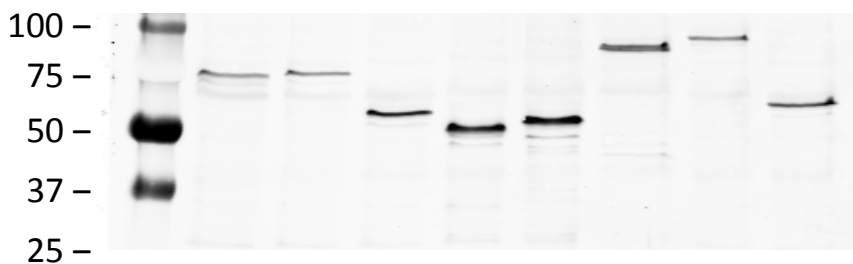

**C)**

**PA-GII.4/MD145**

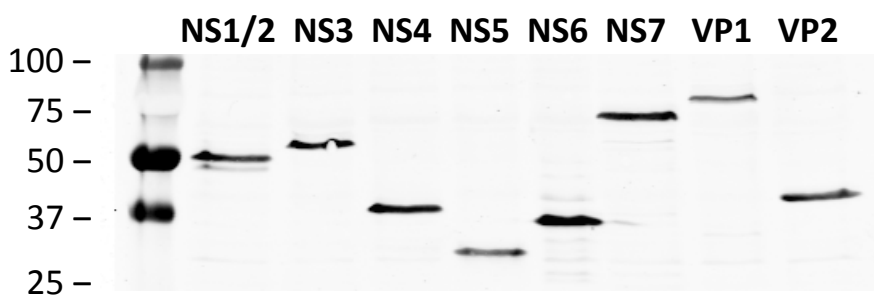

Source: http://www.biorxiv.org/content/10.1101/175463v1.full.pdf
